# Supplementary material
Source: publisher figshare collection journal article supplement (https://tandf.figshare.com/articles/dataset/_/7056401)
Supplement: Supplementary file 1 [file 5]

# Supplementary Material for Hui et al., Semiparametric Regression using Variational Approximations

## A Proofs and Derivations

### A.1 Derivation of $\underline{\ell}_{\text{Norm}}(\Psi, \xi)$

First note that  $\int \mathbf{z}_i^\top \beta h(\beta|\mathbf{a}, \mathbf{A}) d\beta = \mathbf{z}_i^\top \mathbf{a}$ , which deals with the third term in  $\ln\{f(y_i|\Psi, \beta)\}$ . Using the fact that  $\beta$  is multivariate normal with respect to the variational distribution, we obtain  $\int \beta^\top \mathbf{z}_i \mathbf{z}_i^\top \beta h(\beta|\mathbf{a}, \mathbf{A}) d\beta = \mathbf{a}^\top \mathbf{z}_i \mathbf{z}_i^\top \mathbf{a} + \text{tr}(\mathbf{z}_i \mathbf{z}_i^\top \mathbf{A}) = \mathbf{a}^\top \mathbf{z}_i \mathbf{z}_i^\top \mathbf{a} + \mathbf{z}_i^\top \mathbf{A} \mathbf{z}_i$ . Combining the above results, we thus obtain  $\int \ln\{f(y_i|\Psi, \beta)\} h(\beta|\mathbf{a}, \mathbf{A}) d\beta = -(2\phi)^{-1} \{\tilde{r}_i^2 + \mathbf{a}^\top \mathbf{z}_i \mathbf{z}_i^\top \mathbf{a} + \mathbf{z}_i^\top \mathbf{A} \mathbf{z}_i\} + \phi^{-1} \tilde{r}_i \mathbf{z}_i^\top \mathbf{a} - 2^{-1} \ln(2\pi\phi)$ . The form for  $\underline{\ell}_{\text{Norm}}(\Psi, \xi)$  follows by recognizing  $\tilde{r}_i^2 + \mathbf{a}^\top \mathbf{z}_i \mathbf{z}_i^\top \mathbf{a} - 2\tilde{r}_i \mathbf{z}_i^\top \mathbf{a} = (\tilde{r}_i - \mathbf{z}_i^\top \mathbf{a})^2$ .

### A.2 Score equations for Updating Coefficients in the Variational Approximations Approach

For the Poisson response case in Section 3.1 of the main text, we update  $(\kappa, \mathbf{a})$  by fitting a log-link Poisson GLM with linear predictor  $\mathbf{x}_i^\top \kappa + \mathbf{z}_i^\top \mathbf{a}$ , an offset equal to  $2^{-1} \mathbf{z}_i^\top \mathbf{A} \mathbf{z}_i$ , and a quadratic penalty of  $2^{-1} \sum_{j=1}^q \lambda_j \mathbf{a}_j^\top \mathbf{S}_j \mathbf{a}_j$ . The relevant score equations are then

$$\begin{aligned} \frac{\partial \underline{\ell}_{\text{Pois}}(\Psi, \xi)}{\partial \kappa} &= \sum_{i=1}^n \left\{ y_i - \exp \left( \mathbf{x}_i^\top \kappa + \mathbf{z}_i^\top \mathbf{a} + \frac{1}{2} \mathbf{z}_i^\top \mathbf{A} \mathbf{z}_i \right) \right\} \mathbf{x}_i \\ \frac{\partial \underline{\ell}_{\text{Pois}}(\Psi, \xi)}{\partial \mathbf{a}} &= \sum_{i=1}^n \left\{ y_i - \exp \left( \mathbf{x}_i^\top \kappa + \mathbf{z}_i^\top \mathbf{a} + \frac{1}{2} \mathbf{z}_i^\top \mathbf{A} \mathbf{z}_i \right) \right\} \mathbf{z}_i - \sum_{j=1}^q \lambda_j \mathbf{S}_j \mathbf{a}_j. \end{aligned}$$

For the normal response case in Section 3.2 of the main text, we update  $(\kappa, \mathbf{a})$  by fitting a linear model with linear predictor  $\mathbf{x}_i^\top \kappa + \mathbf{z}_i^\top \mathbf{a}$ , and a quadratic penalty of  $2^{-1} \sum_{j=1}^q \lambda_j \mathbf{a}_j^\top \mathbf{S}_j \mathbf{a}_j$ . The relevant

18 score equations are then

$$\begin{aligned}\frac{\partial \ell_{\text{Norm}}(\Psi, \xi)}{\partial \kappa} &= \frac{1}{\phi} \sum_{i=1}^n \left( y_i - \mathbf{x}_i^\top \kappa - \mathbf{z}_i^\top \mathbf{a} \right) \mathbf{x}_i \\ \frac{\partial \ell_{\text{Norm}}(\Psi, \xi)}{\partial \mathbf{a}} &= \frac{1}{\phi} \sum_{i=1}^n \left( y_i - \mathbf{x}_i^\top \kappa - \mathbf{z}_i^\top \mathbf{a} \right) \mathbf{z}_i - \sum_{j=1}^q \lambda_j \mathbf{S}_j \mathbf{a}_j.\end{aligned}$$

19 Conditional on the other parameters, this leads to closed-form updates  $\kappa = \left( \sum_{i=1}^n \mathbf{x}_i \mathbf{x}_i^\top \right)^{-1} \sum_{i=1}^n (y_i -$   
 20  $\mathbf{z}_i^\top \mathbf{a}) \mathbf{x}_i$  and  $\mathbf{a} = \left( \sum_{i=1}^n \mathbf{z}_i \mathbf{z}_i^\top + \phi \mathbf{S}_\lambda \right)^{-1} \sum_{i=1}^n (y_i - \mathbf{x}_i^\top \kappa) \mathbf{z}_i$ .

21 Finally, for the Bernoulli response case in Section 3.3, we update  $(\kappa, \mathbf{a})$  by fitting a logistic  
 22 regression model with linear predictor  $\mathbf{x}_i^\top \kappa + \mathbf{z}_i^\top \mathbf{a}$ , an offset equal to  $2^{-1} \mathbf{z}_i^\top \mathbf{A} \mathbf{z}_i$ , and a quadratic  
 23 penalty of  $2^{-1} \sum_{j=1}^q \lambda_j \mathbf{a}_j^\top \mathbf{S}_j \mathbf{a}_j$ . The relevant score equations are then

$$\begin{aligned}\frac{\partial \ell_{\text{Bern}}(\Psi, \xi)}{\partial \kappa} &= \sum_{i=1}^n (y_i - \mu_i) \mathbf{x}_i \\ \frac{\partial \ell_{\text{Bern}}(\Psi, \xi)}{\partial \mathbf{a}} &= \sum_{i=1}^n (y_i - \mu_i) \mathbf{z}_i - \sum_{j=1}^q \lambda_j \mathbf{S}_j \mathbf{a}_j,\end{aligned}$$

24 where  $\mu_i = \{1 + \exp(\mathbf{x}_i^\top \kappa + \mathbf{z}_i^\top \mathbf{a} + \frac{1}{2} \mathbf{z}_i^\top \mathbf{A} \mathbf{z}_i)\}^{-1} \exp(\mathbf{x}_i^\top \kappa + \mathbf{z}_i^\top \mathbf{a} + \frac{1}{2} \mathbf{z}_i^\top \mathbf{A} \mathbf{z}_i)$ . In both the Pois-  
 25 son and Bernoulli response case, the estimates can be obtained by using a penalized iterative  
 26 reweighted least-squares approach, as detailed in Sections 4.2 and 4.3 of Wood (2006).

### 27 A.3 Derivation of $I_v(\hat{\Psi}, \hat{\lambda})$ for Common Responses

28 For Poisson distributed responses, let  $\eta_i = \mathbf{x}_i^\top \kappa + \mathbf{z}_i^\top \beta$ . Then ignoring constants, we have  
 29  $\ell_{\text{com}}(\Psi, \beta) = \sum_{i=1}^n \{y_i \eta_i - \exp(\eta_i)\} + \sum_{j=1}^q \left( 2^{-1} d_j \ln(\lambda_j) - 2^{-1} \lambda_j \beta_j^\top \mathbf{S}_j \beta_j \right)$ . Letting  $r_i = y_i - \exp(\eta_i)$ ,  
 30 we obtain

$$\frac{\partial \ell_{\text{com}}(\Psi, \beta)}{\partial (\Psi, \lambda)} = \left( \sum_{i=1}^n r_i \mathbf{x}_i, \frac{d_1}{2\lambda_1} - \frac{\beta_1^\top \mathbf{S}_1 \beta_1}{2}, \dots, \frac{d_q}{2\lambda_q} - \frac{\beta_q^\top \mathbf{S}_q \beta_q}{2} \right)$$

$$-\frac{\partial^2 \ell_{\text{com}}(\Psi, \beta)}{\partial(\Psi, \lambda) \partial(\Psi, \lambda)^\top} = \begin{pmatrix} \sum_{i=1}^n \exp(\eta_i) \mathbf{x}_i \mathbf{x}_i^\top & 0 & \dots & 0 \\ 0 & \frac{d_1}{2\lambda_1^2} & \dots & 0 \\ \vdots & 0 & \ddots & 0 \\ 0 & 0 & 0 & \frac{d_q}{2\lambda_q^2} \end{pmatrix}.$$

31 For normally distributed responses, let  $r_i = y_i - \mathbf{x}_i^\top \boldsymbol{\kappa} - \mathbf{z}_i^\top \boldsymbol{\beta}$ . Then ignoring constants, we have  
 32  $\ell_{\text{com}}(\Psi, \beta) = -2^{-1}n \ln(\phi) - (2\phi)^{-1} \sum_{i=1}^n r_i^2 + \sum_{j=1}^q \left( 2^{-1}d_j \ln(\lambda_j) - 2^{-1}\lambda_j \boldsymbol{\beta}_j^\top \mathbf{S}_j \boldsymbol{\beta}_j \right)$ , from which we  
 33 can obtain

$$\begin{aligned} \frac{\partial \ell_{\text{com}}(\Psi, \beta)}{\partial(\Psi, \lambda)} &= \left( \sum_{i=1}^n \frac{r_i \mathbf{x}_i}{\phi}, -\frac{n}{2\phi} + \sum_{i=1}^n \frac{r_i^2}{2\phi^2}, \frac{d_1}{2\lambda_1} - \frac{\boldsymbol{\beta}_1^\top \mathbf{S}_1 \boldsymbol{\beta}_1}{2}, \dots, \frac{d_q}{2\lambda_q} - \frac{\boldsymbol{\beta}_q^\top \mathbf{S}_q \boldsymbol{\beta}_q}{2} \right) \\ -\frac{\partial^2 \ell_{\text{com}}(\Psi, \beta)}{\partial(\Psi, \lambda) \partial(\Psi, \lambda)^\top} &= \begin{pmatrix} \sum_{i=1}^n \frac{\mathbf{x}_i \mathbf{x}_i^\top}{\phi} & \sum_{i=1}^n \frac{\mathbf{x}_i r_i}{\phi^2} & 0 & \dots & 0 \\ \sum_{i=1}^n \frac{r_i \mathbf{x}_i^\top}{\phi} & -\frac{n}{2\phi^2} + \sum_{i=1}^n \frac{r_i^2}{\phi^3} & 0 & \dots & 0 \\ 0 & 0 & \frac{d_1}{2\lambda_1^2} & \dots & 0 \\ \vdots & \vdots & 0 & \ddots & 0 \\ 0 & 0 & 0 & 0 & \frac{d_q}{2\lambda_q^2} \end{pmatrix}. \end{aligned}$$

34 Finally, for Bernoulli responses, we can write the complete log-likelihood as  $\ell_{\text{com}}(\Psi, \beta) =$   
 35  $\sum_{i=1}^n [y_i \eta_i - \ln \{1 + \exp(\eta_i)\}] + \sum_{j=1}^q \left( 2^{-1}d_j \ln(\lambda_j) - 2^{-1}\lambda_j \boldsymbol{\beta}_j^\top \mathbf{S}_j \boldsymbol{\beta}_j \right)$ , where  $\eta_i = \mathbf{x}_i^\top \boldsymbol{\kappa} + \mathbf{z}_i^\top \boldsymbol{\beta}$  and  
 36 quantities constant as a function of  $\Psi$  and  $\beta$  are omitted. From straightforward differentiation, we  
 37 obtain

$$\frac{\partial \ell_{\text{com}}(\Psi, \beta)}{\partial(\Psi, \lambda)} = \left( \sum_{i=1}^n r_i \mathbf{x}_i, \frac{d_1}{2\lambda_1} - \frac{\boldsymbol{\beta}_1^\top \mathbf{S}_1 \boldsymbol{\beta}_1}{2}, \dots, \frac{d_q}{2\lambda_q} - \frac{\boldsymbol{\beta}_q^\top \mathbf{S}_q \boldsymbol{\beta}_q}{2} \right)$$

$$-\frac{\partial^2 \ell_{\text{com},i}(\Psi, \beta)}{\partial(\Psi, \lambda) \partial(\Psi, \lambda)^\top} = \begin{pmatrix} \sum_{i=1}^n w_i \mathbf{x}_i \mathbf{x}_i^\top & 0 & \dots & 0 \\ 0 & \frac{d_1}{2\lambda_1^2} & \dots & 0 \\ \vdots & 0 & \ddots & 0 \\ 0 & 0 & 0 & \frac{d_q}{2\lambda_q^2} \end{pmatrix},$$

where  $r_i = y_i - \exp(\eta_i)\{1 + \exp(\eta_i)\}^{-1}$  and  $w_i = \exp(\eta_i)\{1 + \exp(\eta_i)\}^{-2}$ .

## A.4 Proof of Lemma 1

For all of the developments below, it is important to point out that notation-wise,  $\beta$  and  $\mathbf{a}$  will be used interchangeably to denote the smoothing coefficients. Specifically, while the true parameters are denoted by  $\beta^0$  and the variational estimates are denoted by  $\hat{\mathbf{a}}$ , general reference to the smoothing coefficients will be made as  $\theta = (\Psi^\top, \beta^\top)^\top$  or  $\theta = (\Psi^\top, \mathbf{a}^\top)^\top$ .

We will prove the results separately for each of the three response types.

Normal response: We have  $\mathbf{A} = \left( \mathbf{S}_\lambda + \phi^{-1} \sum_{i=1}^n \mathbf{z}_i \mathbf{z}_i^\top \right)^{-1} = n^{-1} \left( n^{-1} \mathbf{S}_\lambda + n^{-1} \phi^{-1} \sum_{i=1}^n \mathbf{z}_i \mathbf{z}_i^\top \right)^{-1}$ .

Since  $\lambda_j = o(n^{1/2})$ , then  $n^{-1} \mathbf{S}_\lambda = o(1)$  element-wise and we need only focus on the second term in the denominator. Next, let  $\mathbf{B}_i = (\mathbf{x}_i^\top, \mathbf{z}_i^\top)^\top$  be the full  $(p+d)$ -vector of covariates for observation  $i$ . Applying Condition (C4) to the normal response case, we have that  $\mathcal{J}(\theta^0) = (\phi^0)^{-1} \mathbf{B}_1 \mathbf{B}_1^\top$  is a finite and positive definite and hence the principled submatrix  $\mathcal{J}_z(\theta^0) = (\phi^0)^{-1} \mathbf{z}_1 \mathbf{z}_1^\top$  is also finite and positive definite. Since  $\phi$  is chosen to satisfy  $\phi \rightarrow \phi^0$ , then by independence of the observations it follows that  $n^{-1} \phi^{-1} \sum_{i=1}^n \mathbf{z}_i \mathbf{z}_i^\top$  converges to  $\mathcal{J}_z(\theta^0)$ . It follows that  $\mathbf{A} = O_p(n^{-1})$  element-wise.

Poisson response: We write  $\mathbf{A}^{(1)} = \left( \mathbf{S}_\lambda + \sum_{i=1}^n w_i \mathbf{z}_i \mathbf{z}_i^\top \right)^{-1} = n^{-1} \left( n^{-1} \mathbf{S}_\lambda + n^{-1} \sum_{i=1}^n w_i \mathbf{z}_i \mathbf{z}_i^\top \right)^{-1}$

where  $w_i = \exp(\mathbf{x}_i^\top \boldsymbol{\kappa} + \mathbf{z}_i^\top \mathbf{a} + 2^{-1} \mathbf{z}_i^\top \mathbf{A}^{(0)} \mathbf{z}_i)$ . Since  $n^{-1} \mathbf{S}_\lambda = o(1)$  element-wise, then we can solely focus on the second term in the denominator. Applying Condition (C4), we obtain  $\mathcal{J}(\theta^0) = w_1^0 \mathbf{B}_1 \mathbf{B}_1^\top$  is finite and positive definite where  $w_1^0 = \exp(\mathbf{x}_1^\top \boldsymbol{\kappa}^0 + \mathbf{z}_1^\top \beta^0)$ , and hence  $\mathcal{J}_z(\theta^0) =$

$w_1^0 \mathbf{z}_1 \mathbf{z}_1^\top$  is also finite and positive definite. Suppose we take  $\mathbf{A}^{(0)} = n^{-r} \mathbf{I}_d$  for  $r > 2^{-1}$  as an  
 starting value, where  $\mathbf{I}_d$  denotes an identity matrix of dimension  $d$ . Since  $\boldsymbol{\theta}$  is chosen to satisfy  
 $\|\boldsymbol{\theta} - \boldsymbol{\theta}^0\| = O(d^{1/2} n^{-1/2})$ , then by independence of the observations it follows that  $n^{-1} \sum_{i=1}^n w_i \mathbf{z}_i \mathbf{z}_i^\top$   
 converges to  $\mathcal{J}_z(\boldsymbol{\theta}^0)$ . It follows that  $\mathbf{A} = O_p(n^{-1})$  element-wise.  
Bernoulli response: Write  $\mathbf{A}^{(1)} = \left( \mathbf{S}_\lambda + \sum_{i=1}^n \tilde{w}_i \mathbf{z}_i \mathbf{z}_i^\top \right)^{-1} = n^{-1} \left( n^{-1} \mathbf{S}_\lambda + n^{-1} \sum_{i=1}^n \tilde{w}_i \mathbf{z}_i \mathbf{z}_i^\top \right)^{-1}$   
 where  $\tilde{w}_i = \left\{ 1 + \exp \left( -\mathbf{x}_i^\top \boldsymbol{\kappa} - \mathbf{z}_i^\top \mathbf{a} - 2^{-1} \mathbf{z}_i^\top \mathbf{A}^{(0)} \mathbf{z}_i \right) \right\}^{-1}$ . Since  $\lambda_j = o(n^{1/2})$ , then  $n^{-1} \mathbf{S}_\lambda =$   
 $o(1)$  element-wise and we need only focus on the second term in the denominator. Suppose  
 we take  $\mathbf{A}^{(0)} = n^{-r} \mathbf{I}_d$  for  $r > 2^{-1}$  as a starting value, where  $\mathbf{I}_d$  denotes an identity matrix of  
 dimension  $d$ . Since  $\boldsymbol{\theta}$  is chosen to satisfy  $\|\boldsymbol{\theta} - \boldsymbol{\theta}^0\| = O(d^{1/2} n^{-1/2})$ , then by independence  
 of the observations it follows that  $n^{-1} \sum_{i=1}^n \tilde{w}_i \mathbf{z}_i \mathbf{z}_i^\top$  converges to  $\tilde{\mathcal{J}}(\boldsymbol{\theta}^0) = \tilde{w}_1^0 \mathbf{z}_1 \mathbf{z}_1^\top$  where  $\tilde{w}_1^0 =$   
 $\left\{ 1 + \exp \left( -\mathbf{x}_1^\top \boldsymbol{\kappa}^0 - \mathbf{z}_1^\top \boldsymbol{\beta}^0 \right) \right\}^{-1}$ . It remains then to prove that this matrix is finite and positive  
 definite. To show this, note that  $1 + \exp \left( \mathbf{x}_i^\top \boldsymbol{\kappa}^0 + \mathbf{z}_i^\top \boldsymbol{\beta}^0 \right) > 1$  and hence it is straightforward to show  
 $\tilde{w}_1^0 > w_1^0$  where  $w_1^0 = \exp \left( \mathbf{x}_1^\top \boldsymbol{\kappa}^0 + \mathbf{z}_1^\top \boldsymbol{\beta}^0 \right) \left\{ 1 + \exp \left( \mathbf{x}_1^\top \boldsymbol{\kappa}^0 + \mathbf{z}_1^\top \boldsymbol{\beta}^0 \right) \right\}^{-2}$ . Next, applying Condition  
 (C4) we have that  $\mathcal{J}(\boldsymbol{\theta}^0) = w_1^0 \mathbf{B}_1 \mathbf{B}_1^\top$  is finite and positive definite, and hence  $\mathcal{J}_z(\boldsymbol{\theta}^0) = w_1^0 \mathbf{z}_1 \mathbf{z}_1^\top$  is  
 also finite and positive definite. Since  $\tilde{w}_1^0 > w_1^0$ , and noting that  $\tilde{w}_1^0$  is bounded by some sufficiently  
 large constant under Condition (C3), then  $\tilde{\mathcal{J}}(\boldsymbol{\theta}^0)$  must also be finite and positive definite. It follows  
 that  $\mathbf{A} = O_p(n^{-1})$  element-wise.

## A.5 Proof of Theorem 1

We first prove the following result relating the variational and true model log-likelihood functions.

**Proposition 1.** Assume  $\mathbf{A} = O(n^{-1})$  element-wise, and let  $R = 2^{-1} \sum_{j=1}^q d_j \ln(\lambda_j) - \text{tr}(\mathbf{S}_\lambda \mathbf{A}) +$   
 $2^{-1} \ln \det(\mathbf{A})$ . Then for normal responses we have

$$\underline{\ell}_{\text{Norm}}(\boldsymbol{\Psi}, \boldsymbol{\xi}) = \ell(\boldsymbol{\theta}) - \frac{1}{2} \mathbf{a}^\top \mathbf{S}_\lambda \mathbf{a} - \frac{1}{2\phi} \sum_{i=1}^n \mathbf{z}_i^\top \mathbf{A} \mathbf{z}_i + R,$$

77 where  $\ell(\boldsymbol{\theta}) = \sum_{i=1}^n \ln f(y_i|\boldsymbol{\theta})$  and  $f(y_i|\boldsymbol{\theta})$  is the normal distribution with mean  $\mathbf{x}_i^\top \boldsymbol{\kappa} + \mathbf{z}_i^\top \boldsymbol{\beta}$  and  
 78 variance  $\phi$ .

79 For Poisson responses, we have

$$\underline{\ell}_{\text{Pois}}(\boldsymbol{\Psi}, \boldsymbol{\xi}) = \ell(\boldsymbol{\theta}) - \sum_{i=1}^n \exp(\mathbf{x}_i^\top \boldsymbol{\kappa} + \mathbf{z}_i^\top \mathbf{a}) \left| O\left(\frac{d^2}{n}\right) \right| - \frac{1}{2} \mathbf{a}^\top \mathbf{S}_\lambda \mathbf{a} + R.$$

80 where  $\ell(\boldsymbol{\theta}) = \sum_{i=1}^n \ln f(y_i|\boldsymbol{\theta})$  and  $f(y_i|\boldsymbol{\theta})$  is the Poisson distribution with mean  $\exp(\mathbf{x}_i^\top \boldsymbol{\kappa} + \mathbf{z}_i^\top \boldsymbol{\beta})$ .

81 For Bernoulli responses, we have

$$\underline{\ell}_{\text{Bern}}(\boldsymbol{\Psi}, \boldsymbol{\xi}) = \ell(\boldsymbol{\theta}) - \sum_{i=1}^n \exp(\mathbf{x}_i^\top \boldsymbol{\kappa} + \mathbf{z}_i^\top \mathbf{a}) \left| O\left(\frac{d^2}{n}\right) \right| - \frac{1}{2} \mathbf{a}^\top \mathbf{S}_\lambda \mathbf{a} + R,$$

82 where  $\ell(\boldsymbol{\theta}) = \sum_{i=1}^n \ln f(y_i|\boldsymbol{\theta})$  and  $f(y_i|\boldsymbol{\theta})$  is the Bernoulli distribution with mean  $\{1 + \exp(-\mathbf{x}_i^\top \boldsymbol{\kappa} -$   
 83  $\mathbf{z}_i^\top \boldsymbol{\beta})\}^{-1}$ .

84 *Proof.* The normal response case is trivial by realizing that

$$85 \quad \ell(\boldsymbol{\theta}) = -2^{-1} n \ln(\phi) - (2\phi)^{-1} \sum_{i=1}^n (y_i - \mathbf{x}_i^\top \boldsymbol{\kappa} - \mathbf{z}_i^\top \boldsymbol{\beta})^2.$$

86 For both the Poisson and Bernoulli response case we will use the fact that under Conditions (C2)

87 and (C6) and given  $\mathbf{A} = O(n^{-1})$  element-wise, we obtain  $\mathbf{z}_i^\top \mathbf{A} \mathbf{z}_i \leq \|\mathbf{z}_i^\top\|^2 \|\mathbf{A}\| = O(d^2 n^{-1}) = o(1)$

88 for all  $i = 1, \dots, n$ .

89 Turning specifically to the Poisson response case, by using the Taylor expansion  $\exp(2^{-1} \mathbf{z}_i^\top \mathbf{A} \mathbf{z}_i) =$

90  $1 + O(\mathbf{z}_i^\top \mathbf{A} \mathbf{z}_i)$  for  $\mathbf{z}_i^\top \mathbf{A} \mathbf{z}_i \rightarrow 0$ , we can write the variational log-likelihood as

$$\begin{aligned} \underline{\ell}_{\text{Pois}}(\boldsymbol{\Psi}, \boldsymbol{\xi}) &= \sum_{i=1}^n \left\{ y_i \left( \mathbf{x}_i^\top \boldsymbol{\kappa} + \mathbf{z}_i^\top \mathbf{a} \right) - \exp \left( \mathbf{x}_i^\top \boldsymbol{\kappa} + \mathbf{z}_i^\top \mathbf{a} \right) \exp \left( \frac{1}{2} \mathbf{z}_i^\top \mathbf{A} \mathbf{z}_i \right) \right\} - \frac{1}{2} \mathbf{a}^\top \mathbf{S}_\lambda \mathbf{a} + R \\ &= \sum_{i=1}^n \left[ y_i \left( \mathbf{x}_i^\top \boldsymbol{\kappa} + \mathbf{z}_i^\top \mathbf{a} \right) - \exp \left( \mathbf{x}_i^\top \boldsymbol{\kappa} + \mathbf{z}_i^\top \mathbf{a} \right) \left\{ 1 + O\left(\frac{d^2}{n}\right) \right\} \right] - \frac{1}{2} \mathbf{a}^\top \mathbf{S}_\lambda \mathbf{a} + R \\ &= \ell(\boldsymbol{\theta}) - \sum_{i=1}^n \exp(\mathbf{x}_i^\top \boldsymbol{\kappa} + \mathbf{z}_i^\top \mathbf{a}) \left| O\left(\frac{d^2}{n}\right) \right| - \frac{1}{2} \mathbf{a}^\top \mathbf{S}_\lambda \mathbf{a} + R, \end{aligned}$$

91 where the constant  $-\sum_{i=1}^n \ln(y_i!)$  is added in the last step.

92 For the Bernoulli response case, we will use the fact that  $\ln(c + \varepsilon) = \ln(c) + O(\varepsilon)$  if  $\varepsilon \rightarrow 0$  and  $c$   
 93 is positive and bounded away from zero. Choosing  $\varepsilon = \exp(\mathbf{x}_i^\top \boldsymbol{\kappa} + \mathbf{z}_i^\top \mathbf{a}) (\exp(2^{-1} \mathbf{z}_i^\top \mathbf{A} \mathbf{z}_i) - 1)$ ,  
 94 and recognizing that this satisfies  $\varepsilon \rightarrow 0$  given Conditions (C2) and (C6) and  $\mathbf{A} = O(n^{-1})$  element-  
 95 wise, then we can write the variational log-likelihood as follows

$$\begin{aligned} \underline{\ell}_{\text{Bern}}(\boldsymbol{\Psi}, \boldsymbol{\xi}) &= \sum_{i=1}^n \left[ y_i (\mathbf{x}_i^\top \boldsymbol{\kappa} + \mathbf{z}_i^\top \mathbf{a}) - \ln \left\{ 1 + \exp \left( \mathbf{x}_i^\top \boldsymbol{\kappa} + \mathbf{z}_i^\top \mathbf{a} + \frac{1}{2} \mathbf{z}_i^\top \mathbf{A} \mathbf{z}_i \right) \right\} \right] + R \\ &= \sum_{i=1}^n \left[ y_i (\mathbf{x}_i^\top \boldsymbol{\kappa} + \mathbf{z}_i^\top \mathbf{a}) \right. \\ &\quad \left. - \ln \left\{ 1 + \exp(\mathbf{x}_i^\top \boldsymbol{\kappa} + \mathbf{z}_i^\top \mathbf{a}) + \exp(\mathbf{x}_i^\top \boldsymbol{\kappa} + \mathbf{z}_i^\top \mathbf{a}) \left( \exp\left(\frac{1}{2} \mathbf{z}_i^\top \mathbf{A} \mathbf{z}_i\right) - 1 \right) \right\} \right] + R \\ &= \ell(\boldsymbol{\theta}) - \sum_{i=1}^n \left| O \left\{ \exp(\mathbf{x}_i^\top \boldsymbol{\kappa} + \mathbf{z}_i^\top \mathbf{a}) \left( \exp\left(\frac{1}{2} \mathbf{z}_i^\top \mathbf{A} \mathbf{z}_i\right) - 1 \right) \right\} \right| - \frac{1}{2} \mathbf{a}^\top \mathbf{S}_\lambda \mathbf{a} + R \\ &= \ell(\boldsymbol{\theta}) - \sum_{i=1}^n \exp(\mathbf{x}_i^\top \boldsymbol{\kappa} + \mathbf{z}_i^\top \mathbf{a}) \left| O \left( \frac{d^2}{n} \right) \right| - \frac{1}{2} \mathbf{a}^\top \mathbf{S}_\lambda \mathbf{a} + R, \end{aligned}$$

96 where to go from the third to the fourth expressions on the right hand side, we again use the result  
 97  $\exp(2^{-1} \mathbf{z}_i^\top \mathbf{A} \mathbf{z}_i) = 1 + O(\mathbf{z}_i^\top \mathbf{A} \mathbf{z}_i)$  for  $\mathbf{z}_i^\top \mathbf{A} \mathbf{z}_i \rightarrow 0$ .  $\square$

98 Proposition 1 is critical, as it allows us to then relate the first and second derivatives of the  
 99 variational log-likelihood to the corresponding derivatives of true model log-likelihood as follows.  
 100 To see this, write the variational log-likelihood as  $\underline{\ell}(\boldsymbol{\Psi}, \boldsymbol{\xi}) = \underline{\ell}\{\boldsymbol{\theta}, \text{vech}(\mathbf{A})\}$ , and let  $\nabla_{\boldsymbol{\theta}}$  and  $\nabla_{\boldsymbol{\theta}}^2$   
 101 with the first and second derivative operators with respect to  $\boldsymbol{\theta}$ . Also, define  $\mathbf{B}_i = (\mathbf{x}_i^\top, \mathbf{z}_i^\top)^\top$ . Then  
 102 we have

$$\begin{aligned} \nabla_{\boldsymbol{\theta}} \underline{\ell}_{\text{Norm}}\{\boldsymbol{\theta}, \text{vech}(\mathbf{A})\} &= \nabla_{\boldsymbol{\theta}} \ell(\boldsymbol{\theta}) - \left( \mathbf{0}, -\frac{1}{2\phi^2} \sum_{i=1}^n \mathbf{z}_i^\top \mathbf{A} \mathbf{z}_i, \mathbf{S}_\lambda \mathbf{a} \right) \\ \nabla_{\boldsymbol{\theta}} \underline{\ell}_{\text{Pois}}\{\boldsymbol{\theta}, \text{vech}(\mathbf{A})\} &= \nabla_{\boldsymbol{\theta}} \ell(\boldsymbol{\theta}) - \sum_{i=1}^n \exp(\mathbf{x}_i^\top \boldsymbol{\kappa} + \mathbf{z}_i^\top \mathbf{a}) \left| O \left( \frac{d^2}{n} \right) \right| \mathbf{B}_i - (\mathbf{0}, \mathbf{S}_\lambda \mathbf{a}) \quad (1) \\ \nabla_{\boldsymbol{\theta}} \underline{\ell}_{\text{Bern}}\{\boldsymbol{\theta}, \text{vech}(\mathbf{A})\} &= \nabla_{\boldsymbol{\theta}} \ell(\boldsymbol{\theta}) - \sum_{i=1}^n \exp(\mathbf{x}_i^\top \boldsymbol{\kappa} + \mathbf{z}_i^\top \mathbf{a}) \left| O \left( \frac{d^2}{n} \right) \right| \mathbf{B}_i - (\mathbf{0}, \mathbf{S}_\lambda \mathbf{a}), \end{aligned}$$

103 Also,

$$\begin{aligned}
-\nabla_{\underline{\theta}}^2 \underline{\ell}_{\text{Norm}}\{\boldsymbol{\theta}, \text{vech}(\mathbf{A})\} &= -\nabla_{\boldsymbol{\theta}}^2 \ell(\boldsymbol{\theta}) + \mathbf{M}_{\text{Norm}}\{\boldsymbol{\theta}, \text{vech}(\mathbf{A})\} \\
-\nabla_{\underline{\theta}}^2 \underline{\ell}_{\text{Pois}}\{\boldsymbol{\theta}, \text{vech}(\mathbf{A})\} &= -\nabla_{\boldsymbol{\theta}}^2 \ell(\boldsymbol{\theta}) + \mathbf{M}_{\text{Pois}}\{\boldsymbol{\theta}, \text{vech}(\mathbf{A})\} \\
-\nabla_{\underline{\theta}}^2 \underline{\ell}_{\text{Bern}}\{\boldsymbol{\theta}, \text{vech}(\mathbf{A})\} &= -\nabla_{\boldsymbol{\theta}}^2 \ell(\boldsymbol{\theta}) + \mathbf{M}_{\text{Bern}}\{\boldsymbol{\theta}, \text{vech}(\mathbf{A})\},
\end{aligned} \tag{2}$$

104 where  $\mathbf{M}_{\text{Norm}}\{\boldsymbol{\theta}, \text{vech}(\mathbf{A})\}$  is a  $(p+d+1) \times (p+d+1)$  matrix with structure

$$\mathbf{M}_{\text{Norm}}\{\boldsymbol{\theta}, \text{vech}(\mathbf{A})\} = \begin{pmatrix} \mathbf{0} & \mathbf{0} & \mathbf{0} \\ \mathbf{0} & (4\phi^3)^{-1} \sum_{i=1}^n \mathbf{z}_i^\top \mathbf{A} \mathbf{z}_i & \mathbf{0} \\ \mathbf{0} & \mathbf{0} & \mathbf{S}_\lambda \end{pmatrix},$$

105 and both  $\mathbf{M}_{\text{Pois}}\{\boldsymbol{\theta}, \text{vech}(\mathbf{A})\}$  and  $\mathbf{M}_{\text{Bern}}\{\boldsymbol{\theta}, \text{vech}(\mathbf{A})\}$  are  $(p+d) \times (p+d)$  matrices with the  
106 following structure

$$\begin{pmatrix} \sum_{i=1}^n \exp(\mathbf{x}_i^\top \boldsymbol{\kappa} + \mathbf{z}_i^\top \mathbf{a}) |O(d^2 n^{-1})| \mathbf{x}_i \mathbf{x}_i^\top & \sum_{i=1}^n \exp(\mathbf{x}_i^\top \boldsymbol{\kappa} + \mathbf{z}_i^\top \mathbf{a}) |O(d^2 n^{-1})| \mathbf{x}_i \mathbf{z}_i^\top \\ \sum_{i=1}^n \exp(\mathbf{x}_i^\top \boldsymbol{\kappa} + \mathbf{z}_i^\top \mathbf{a}) |O(d^2 n^{-1})| \mathbf{z}_i \mathbf{x}_i^\top & \sum_{i=1}^n \exp(\mathbf{x}_i^\top \boldsymbol{\kappa} + \mathbf{z}_i^\top \mathbf{a}) |O(d^2 n^{-1})| \mathbf{z}_i \mathbf{z}_i^\top + \mathbf{S}_\lambda \end{pmatrix}.$$

107 We now move on to the main proof for consistency. To show this, if we can prove that for any  
108 given  $\varepsilon > 0$ , there exists a sufficiently large constant  $K_1 > 0$  such that

$$\mathbf{P} \left( \sup_{\boldsymbol{\theta}: \|\boldsymbol{\theta} - \boldsymbol{\theta}^0\| = d^{1/2} n^{-1/2} K_1} \underline{\ell}\{\boldsymbol{\theta}, \text{vech}(\mathbf{A})\} < \underline{\ell}\{\boldsymbol{\theta}^0, \text{vech}(\mathbf{A})\} \right) \geq 1 - \varepsilon, \tag{3}$$

109 there it implies that with probability tending to 1 there exists a local maximizer of  $\underline{\ell}(\boldsymbol{\Psi}, \boldsymbol{\xi})$  satisfying  
110  $\|\hat{\boldsymbol{\theta}} - \boldsymbol{\theta}^0\| = O_p(d^{1/2} n^{-1/2})$ .

111 To prove (3), first note that any point inside the ball  $\{\boldsymbol{\theta} : \|\boldsymbol{\theta} - \boldsymbol{\theta}^0\| = d^{1/2} n^{-1/2} K_1\}$  satisfies the  
112 conditions of Lemma 1 and hence  $\mathbf{A} = O(n^{-1})$  element-wise. Next applying a Taylor expansion



113 we have

$$\begin{aligned}
\Delta(\boldsymbol{\theta}) &= \underline{\ell}\{\boldsymbol{\theta}, \text{vech}(\mathbf{A})\} - \underline{\ell}\{\boldsymbol{\theta}^0, \text{vech}(\mathbf{A})\} \\
&= (\boldsymbol{\theta} - \boldsymbol{\theta}^0)^\top \nabla_{\boldsymbol{\theta}} \underline{\ell}\{\boldsymbol{\theta}^0, \text{vech}(\mathbf{A})\} - \frac{1}{2}(\boldsymbol{\theta} - \boldsymbol{\theta}^0)^\top [-\nabla_{\boldsymbol{\theta}}^2 \underline{\ell}\{\boldsymbol{\theta}^0, \text{vech}(\mathbf{A})\}] (\boldsymbol{\theta} - \boldsymbol{\theta}^0) \\
&\quad + \frac{1}{6} \sum_{r,s,t=1}^{\dim(\boldsymbol{\theta})} \frac{\partial^3 \underline{\ell}\{\bar{\boldsymbol{\theta}}, \text{vech}(\mathbf{A})\}}{\partial \theta_r \partial \theta_s \partial \theta_t} (\boldsymbol{\theta} - \boldsymbol{\theta}^0)_r (\boldsymbol{\theta} - \boldsymbol{\theta}^0)_s (\boldsymbol{\theta} - \boldsymbol{\theta}^0)_t \\
&\triangleq T_1 + T_2 + T_3,
\end{aligned}$$

114 where  $\bar{\boldsymbol{\theta}}$  lies on the line segment joining  $\boldsymbol{\theta}$  and  $\boldsymbol{\theta}^0$  and  $\dim(\boldsymbol{\theta}) = p + d + 1$  for normal responses  
115 and  $p + d$  for Poisson and Bernoulli responses.

116 For term  $T_1$ , by the Cauchy-Schwarz inequality we obtain  $T_1 \leq \|\boldsymbol{\theta} - \boldsymbol{\theta}^0\| \|\nabla_{\boldsymbol{\theta}} \underline{\ell}\{\boldsymbol{\theta}^0, \text{vech}(\mathbf{A})\}\| =$   
117  $d^{1/2} K_1 \|n^{-1/2} \nabla_{\boldsymbol{\theta}} \underline{\ell}\{\boldsymbol{\theta}^0, \text{vech}(\mathbf{A})\}\|$ . Next, we establish the following three results. First by Con-  
118 ditions (C2)-(C3) and (C6), Lemma 1, and applying the Cauchy-Schwarz inequality, it holds that  
119  $n^{-1/2} \left\| \sum_{i=1}^n \mathbf{z}_i^\top \mathbf{A} \mathbf{z}_i \right\| \leq n^{-1/2} \sum_{i=1}^n \|\mathbf{z}_i\|^2 \|\mathbf{A}\| = O(d^2 n^{-1/2}) = o(1)$  and hence  $2^{-1} n^{-1/2} (\phi^0)^{-2} \left\| \sum_{i=1}^n \mathbf{z}_i^\top \mathbf{A} \mathbf{z}_i \right\| =$   
120  $o(1)$ . Second,  $n^{-1/2} \|\mathbf{S}_\lambda \boldsymbol{\beta}^0\| \leq o(d^{1/2})$  by Conditions (C3), (C6) and  $\lambda_j = o(n^{1/2})$  for all  $j =$   
121  $1, \dots, q$ . Third,  $n^{-1/2} \left\| \sum_{i=1}^n \exp(\mathbf{x}_i^\top \boldsymbol{\kappa}^0 + \mathbf{z}_i^\top \boldsymbol{\beta}^0) |O(d^2 n^{-1})| \mathbf{B}_i \right\| = O(d^{5/2} n^{-1/2}) = o(d^{1/2})$  by Con-  
122 ditions (C2)-(C3) and (C6).

123 Applying the above set of three results, we obtain

124  $\|n^{-1/2} \nabla_{\boldsymbol{\theta}} \underline{\ell}\{\boldsymbol{\theta}^0, \text{vech}(\mathbf{A})\}\| \leq \left\| n^{-1/2} \nabla_{\boldsymbol{\theta}} \ell(\boldsymbol{\theta}^0) \right\| + o(d^{1/2})$ . Finally, since  $\nabla_{\boldsymbol{\theta}} \ell(\boldsymbol{\theta}^0) = \sum_{i=1}^n \partial \ln\{f(y_i|\boldsymbol{\theta}^0)\} / \partial \boldsymbol{\theta}$   
125 where  $f(y_i|\boldsymbol{\theta})$  belongs to the exponential family for all three responses considered, then under  
126 Conditions (C1)-(C4) we can utilize standard asymptotic developments regarding generalized  
127 linear models to show that  $\nabla_{\boldsymbol{\theta}} \ell(\boldsymbol{\theta}^0) = O_p(n^{1/2})$  element-wise (e.g., Zou, 2006). We thus obtain  
128  $T_1 = K_1 O_p(d)$ .

129 For term  $T_2$ , using (2) we can write  $T_2 = -2^{-1}(\boldsymbol{\theta} - \boldsymbol{\theta}^0)^\top \{-\nabla_{\boldsymbol{\theta}}^2 \ell(\boldsymbol{\theta}^0)\}(\boldsymbol{\theta} - \boldsymbol{\theta}^0) - 2^{-1}(\boldsymbol{\theta} -$   
130  $\boldsymbol{\theta}^0)^\top \mathbf{M}_{\text{resp}}(\boldsymbol{\theta}^0)(\boldsymbol{\theta} - \boldsymbol{\theta}^0)$  where  $\mathbf{M}_{\text{resp}}\{\boldsymbol{\theta}^0, \text{vech}(\mathbf{A})\}$  refers to one of  $\mathbf{M}_{\text{Norm}}\{\boldsymbol{\theta}^0, \text{vech}(\mathbf{A})\}$ ,  
131  $\mathbf{M}_{\text{Pois}}\{\boldsymbol{\theta}^0, \text{vech}(\mathbf{A})\}$ , or  $\mathbf{M}_{\text{Bern}}\{\boldsymbol{\theta}^0, \text{vech}(\mathbf{A})\}$  depending on the response type. By the Cauchy-

132 Schwarz inequality,

$$\begin{aligned} (\boldsymbol{\theta} - \boldsymbol{\theta}^0)^\top \mathbf{M}_{\text{resp}}\{\boldsymbol{\theta}^0, \text{vech}(\mathbf{A})\}(\boldsymbol{\theta} - \boldsymbol{\theta}^0) &\leq \|\boldsymbol{\theta} - \boldsymbol{\theta}^0\|^2 \|\mathbf{M}_{\text{resp}}\{\boldsymbol{\theta}^0, \text{vech}(\mathbf{A})\}\| \\ &= dK_1^2 \|n^{-1} \mathbf{M}_{\text{resp}}\{\boldsymbol{\theta}^0, \text{vech}(\mathbf{A})\}\|. \end{aligned}$$

133 Now, for the case of normal responses, we have  $n^{-1} \left| \sum_{i=1}^n \mathbf{z}_i^\top \mathbf{A} \mathbf{z}_i \right| = o(1)$  by Condition (C2) and  
 134 Lemma 1. Also,  $\|n^{-1} \mathbf{S}_\lambda\| = O(\lambda d n^{-1}) = o(1)$  by Condition (C6), and hence we conclude  
 135  $\|n^{-1} \mathbf{M}_{\text{Norm}}\{\boldsymbol{\theta}^0, \text{vech}(\mathbf{A})\}\| = o(1)$ . Turning to Poisson and Bernoulli responses, given  $\|n^{-1} \mathbf{S}_\lambda\| =$   
 136  $o(1)$  then we need only focus on the the matrix  $n^{-1} \sum_{i=1}^n \exp(\mathbf{x}_i^\top \boldsymbol{\kappa}^0 + \mathbf{z}_i^\top \boldsymbol{\beta}^0) |O(d^2 n^{-1})| \mathbf{B}_i \mathbf{B}_i^\top$ . By  
 137 Conditions (C3), it holds that  $\exp(\mathbf{x}_i^\top \boldsymbol{\kappa}^0 + \mathbf{z}_i^\top \boldsymbol{\beta}^0) < K_2 < \infty$  for all  $i = 1, \dots, n$  and some constant  
 138  $K_2$ . Thus by Conditions (C2) and (C6), we have

$$\begin{aligned} \left\| n^{-1} \sum_{i=1}^n \exp(\mathbf{x}_i^\top \boldsymbol{\kappa}^0 + \mathbf{z}_i^\top \boldsymbol{\beta}^0) |O(d^2 n^{-1})| \mathbf{B}_i \mathbf{B}_i^\top \right\| &= O\left(\frac{d^2}{n}\right) \left\| n^{-1} \sum_{i=1}^n \mathbf{B}_i \mathbf{B}_i^\top \right\| \\ &= O\left(\frac{d^3}{n}\right) = o(1) \end{aligned}$$

139 It follows that  $\|n^{-1} \mathbf{M}_{\text{Pois}}\{\boldsymbol{\theta}^0, \text{vech}(\mathbf{A})\}\| = o(1)$  and  $\|n^{-1} \mathbf{M}_{\text{Bern}}\{\boldsymbol{\theta}^0, \text{vech}(\mathbf{A})\}\| = o(1)$ , and  
 140 hence  $T_2 = -2^{-1}(\boldsymbol{\theta} - \boldsymbol{\theta}^0)^\top \{-\nabla_{\boldsymbol{\theta}}^2 \ell(\boldsymbol{\theta}^0)\}(\boldsymbol{\theta} - \boldsymbol{\theta}^0) + K_1^2 o(d)$ .

141 Write the first term of  $T_2$  and  $-2^{-1}n(\boldsymbol{\theta} - \boldsymbol{\theta}^0)^\top \{-n^{-1} \nabla_{\boldsymbol{\theta}}^2 \ell(\boldsymbol{\theta}^0)\}(\boldsymbol{\theta} - \boldsymbol{\theta}^0)$ . Then we make use of  
 142 the following result.

143 **Proposition 2.**  $\| -n^{-1} \nabla_{\boldsymbol{\theta}}^2 \ell(\boldsymbol{\theta}^0) - \mathcal{J}(\boldsymbol{\theta}^0) \| = O_p(d^{-1})$

144 *Proof.* By Markov's inequality and independence of the observations,

$$\begin{aligned} \mathbb{P}\left(\left\| -\frac{1}{n} \nabla_{\boldsymbol{\theta}}^2 \ell(\boldsymbol{\theta}^0) - \mathcal{J}(\boldsymbol{\theta}^0) \right\| \geq \frac{\varepsilon_2}{d}\right) &\leq \frac{d^2}{n^2 \varepsilon_2^2} \sum_{i=1}^n \mathbb{E} \left( \sum_{r,s=1}^{\dim(\boldsymbol{\theta})} \left\{ \frac{\partial^2 \ln\{f(y_i|\boldsymbol{\theta}^0)\}}{\partial \theta_r \partial \theta_s} - \mathbb{E} \left( \frac{\partial^2 \ln\{f(y_i|\boldsymbol{\theta}^0)\}}{\partial \theta_r \partial \theta_s} \right) \right\}^2 \right) \\ &= \frac{d^2}{n^2 \varepsilon_2^2} n O(d^2) \quad \text{by Condition (C5)} \\ &= O\left(\frac{d^4}{n}\right) = o(1) \quad \text{by Condition (C6).} \end{aligned}$$

145 and the required result follows.  $\square$

146 Applying the above proposition, we obtain

$$\begin{aligned} -\frac{1}{2}n(\boldsymbol{\theta} - \boldsymbol{\theta}^0)^\top \{-n^{-1}\nabla_{\boldsymbol{\theta}}^2 \ell(\boldsymbol{\theta}^0)\}(\boldsymbol{\theta} - \boldsymbol{\theta}^0) &= -\frac{1}{2}n(\boldsymbol{\theta} - \boldsymbol{\theta}^0)^\top \left\{ \mathcal{J}(\boldsymbol{\theta}^0) + O_p\left(\frac{1}{d}\right) \right\} (\boldsymbol{\theta} - \boldsymbol{\theta}^0) \\ &= -\frac{1}{2}n(\boldsymbol{\theta} - \boldsymbol{\theta}^0)^\top \mathcal{J}(\boldsymbol{\theta}^0)(\boldsymbol{\theta} - \boldsymbol{\theta}^0) + O_p(1) \end{aligned}$$

147 Therefore,  $T_2 = -2^{-1}n(\boldsymbol{\theta} - \boldsymbol{\theta}^0)^\top \mathcal{J}(\boldsymbol{\theta}^0)(\boldsymbol{\theta} - \boldsymbol{\theta}^0) + K_1^2 o(d)$ . Finally, by Condition (C4) we have  
 148 the minimum eigenvalue of  $\mathcal{J}(\boldsymbol{\theta}^0)$ , denoted here as  $\tau_{\min}$ , is bounded away from zero. Thus  
 149  $n(\boldsymbol{\theta} - \boldsymbol{\theta}^0)^\top \mathcal{J}(\boldsymbol{\theta}^0)(\boldsymbol{\theta} - \boldsymbol{\theta}^0) \geq n\|\boldsymbol{\theta} - \boldsymbol{\theta}^0\|^2 \tau_{\min} = K_1^2 \tau_{\min} d$  and hence  $T_2 \leq -K_1^2 \tau_{\min} d < 0$ .

150 For term  $T_3$ , by the Cauchy-Schwarz and Minowski inequalities, we can write

$$\begin{aligned} 6|T_3| &\leq \|\boldsymbol{\theta} - \boldsymbol{\theta}^0\|^3 \left( \sum_{r,s,t=1}^{\dim(\boldsymbol{\theta})} \left( \frac{\partial^3 \ell\{\bar{\boldsymbol{\theta}}, \text{vech}(\mathbf{A})\}}{\partial \theta_r \partial \theta_s \partial \theta_t} \right)^2 \right)^{1/2} \\ &\leq \|\boldsymbol{\theta} - \boldsymbol{\theta}^0\|^3 \left( \sum_{r,s,t=1}^{\dim(\boldsymbol{\theta})} \left( \frac{\partial^3 \ell(\bar{\boldsymbol{\theta}})}{\partial \theta_r \partial \theta_s \partial \theta_t} \right)^2 \right)^{1/2} + \|\boldsymbol{\theta} - \boldsymbol{\theta}^0\|^3 \left( \sum_{r,s,t=1}^{\dim(\boldsymbol{\theta})} \left( \frac{\partial [M_{\text{resp}}\{\bar{\boldsymbol{\theta}}, \text{vech}(\mathbf{A})\}]_{rs}}{\partial \theta_t} \right)^2 \right)^{1/2} \\ &\triangleq U_1 + U_2 \end{aligned}$$

151 where  $[M\{\bar{\boldsymbol{\theta}}, \text{vech}(\mathbf{A})\}]_{rs}$  refers to element  $(r, s)$  for  $M\{\bar{\boldsymbol{\theta}}, \text{vech}(\mathbf{A})\}$ . Dealing with term  $U_2$  first,  
 152 in the normal response case, from equation (2) we have  $\partial[M_{\text{Norm}}\{\bar{\boldsymbol{\theta}}, \text{vech}(\mathbf{A})\}]_{rs}/\partial \theta_t = 0$  for  
 153 all  $r, s, t = 1, \dots, \dim(\boldsymbol{\theta})$  except for  $\partial[M_{\text{Norm}}\{\bar{\boldsymbol{\theta}}, \text{vech}(\mathbf{A})\}]_{p+1, p+1}/\partial \phi = -12^{-1}\bar{\phi}^{-4} \sum_{i=1}^n \mathbf{z}_i^\top \mathbf{A} \mathbf{z}_i$ .  
 154 Therefore since  $\bar{\phi}$  lies inside the ball  $\{\boldsymbol{\theta} : \|\boldsymbol{\theta} - \boldsymbol{\theta}^0\| = d^{1/2}n^{-1/2}K_1\}$ , then we obtain

$$\begin{aligned} U_2 &= -12K_1^3 \left( \frac{d}{n} \right)^{3/2} \frac{1}{\bar{\phi}^4} \left| \sum_{i=1}^n \mathbf{z}_i^\top \mathbf{A} \mathbf{z}_i \right| \leq -12K_1^3 \left( \frac{d}{n} \right)^{3/2} \frac{1}{\bar{\phi}^4} \sum_{i=1}^n \|\mathbf{z}_i\|^2 \|\mathbf{A}\| \\ &= K_1^3 O_p \left( \frac{d^{7/2}}{n^{3/2}} \right) \quad \text{by Conditions (C2)-(C3) and Lemma 1} \\ &= o_p(1) \quad \text{by Condition (C6).} \end{aligned}$$

155 For Poisson response case, from equation (2), and denoting  $\mathbf{B}_i = (\mathbf{x}_i^\top, \mathbf{z}_i^\top)^\top$ , we have  
 156  $\partial[\mathbf{M}_{\text{Pois}}\{\bar{\boldsymbol{\theta}}, \text{vech}(\mathbf{A})\}]_{rs}/\partial\theta_t = \sum_{i=1}^n \exp(\mathbf{x}_i^\top \bar{\boldsymbol{\kappa}} + \mathbf{z}_i^\top \bar{\boldsymbol{\beta}}) |O_p(d^2 n^{-1})| \mathbf{B}_{ir} \mathbf{B}_{is} \mathbf{B}_{it}$  for  $r, s, t = 1, \dots, \dim(\boldsymbol{\theta})$   
 157 where  $\mathbf{B}_{ir}$  refers to the  $r$ -th element of  $\mathbf{B}_i$ . The same expression is obtained by the Bernoulli re-  
 158 sponse case. Since  $(\bar{\boldsymbol{\kappa}}, \bar{\boldsymbol{\beta}})$  lies inside the ball  $\{\boldsymbol{\theta} : \|\boldsymbol{\theta} - \boldsymbol{\theta}^0\| = d^{1/2} n^{-1/2} K_1\}$ , then we obtain

$$\begin{aligned} U_2 &= K_1^3 \left(\frac{d}{n}\right)^{3/2} \left( \sum_{r,s,t=1}^{\dim(\boldsymbol{\theta})} \left( \sum_{i=1}^n \exp(\mathbf{x}_i^\top \bar{\boldsymbol{\kappa}} + \mathbf{z}_i^\top \bar{\boldsymbol{\beta}}) |O_p(d^2 n^{-1})| \mathbf{B}_{ir} \mathbf{B}_{is} \mathbf{B}_{it} \right)^2 \right)^{1/2} \\ &= K_1^3 \left(\frac{d}{n}\right)^{3/2} O_p(d^{7/2}) \quad \text{by Conditions (C2)-(C3)} \\ &= o_p(1) \quad \text{by Condition (C6)}. \end{aligned}$$

159 It remains then to determine the order of term  $U_1$ . We have

$$\begin{aligned} U_1 &= K_1^3 \left(\frac{d}{n}\right)^{3/2} \left( \sum_{r,s,t=1}^{\dim(\boldsymbol{\theta})} \left( \frac{\partial^3 \ell(\bar{\boldsymbol{\theta}})}{\partial \theta_r \partial \theta_s \partial \theta_t} \right)^2 \right)^{1/2} \\ &= K_1^3 \left(\frac{d}{n}\right)^{3/2} n O_p \left( \sum_{r,s,t=1}^{\dim(\boldsymbol{\theta})} \left( \frac{\partial^3 \ln f(y_1 | \bar{\boldsymbol{\theta}})}{\partial \theta_r \partial \theta_s \partial \theta_t} \right)^2 \right)^{1/2} \quad \text{by independence of the observations} \\ &\leq \frac{K_1^3 d^{3/2}}{n^{1/2}} O_p \left( \sum_{r,s,t=1}^{\dim(\boldsymbol{\theta})} G_{rst}^2(y_1 | \bar{\boldsymbol{\theta}}) \right)^{1/2} \quad \text{by Condition (C5)} \\ &= \frac{K_1^3 d^{3/2}}{n^{1/2}} O_p(d^{3/2}) = K_1^3 o_p(d) \quad \text{by Condition (C6)}. \end{aligned}$$

160 Combining the order results of  $U_1$  and  $U_2$  above, we conclude that  $T_3 = o_p(d)$ .

161 To summarize then, we have  $T_1 = K_1 O_p(d)$ ,  $T_2 \leq -K^2 d \tau_{\min}$ ,  $T_3 = o_p(d)$ . It follows that if  
 162 provided we choose  $K_1$  large enough, then  $T_2$  which is negative asymptotically dominates  $T_1$  and  
 163  $T_2$ , and the probability statement in (3) follows. Therefore we conclude that there exists a local  
 164 maximizer of  $\underline{\ell}(\boldsymbol{\Psi}, \boldsymbol{\xi})$  satisfying  $\|\hat{\boldsymbol{\theta}} - \boldsymbol{\theta}^0\| = O_p(d^{1/2} n^{-1/2})$ . Finally, since as a function of  $\boldsymbol{\theta}$  the  
 165 variational log-likelihood  $\underline{\ell}(\boldsymbol{\Psi}, \boldsymbol{\xi})$  resembles a generalized linear model with a quadratic penalty on  
 166 the smoothing coefficients  $\boldsymbol{a}$ , then it is straightforward to show that the variational log-likelihood is

strictly convex with respect to  $\theta$  for the three response types considered. Hence  $\hat{\theta}$  coincides with the VA estimate (the global maximizer) and the required result follows.

## A.6 Proof of Theorem 2

Based on equation (1) in the proof of Theorem 1, we have the following expressions for the first derivatives of the variational log-likelihood evaluated at  $(\hat{\Psi}, \hat{\xi}) = \{\hat{\theta}, \text{vech}(\hat{A})\}$ ,

$$\begin{aligned} 0 &= \frac{1}{n^{1/2}} \nabla_{\theta} \ell_{\text{Norm}}\{\hat{\theta}, \text{vech}(\hat{A})\} = \frac{1}{n^{1/2}} \nabla_{\theta} \ell(\hat{\theta}) - \left( 0, -\frac{1}{2n^{1/2}\hat{\phi}^2} \sum_{i=1}^n z_i^\top \hat{A} z_i, \frac{1}{n^{1/2}} S_{\lambda} \hat{a} \right) \\ 0 &= \frac{1}{n^{1/2}} \nabla_{\theta} \ell_{\text{Pois}}\{\hat{\theta}, \text{vech}(\hat{A})\} = \frac{1}{n^{1/2}} \nabla_{\theta} \ell(\hat{\theta}) - \frac{1}{n^{1/2}} \sum_{i=1}^n \exp(x_i^\top \hat{\kappa} + z_i^\top \hat{a}) \left| O\left(\frac{d^2}{n}\right) \right| B_i - \left( 0, \frac{1}{n^{1/2}} S_{\lambda} \hat{a} \right) \\ 0 &= \frac{1}{n^{1/2}} \nabla_{\theta} \ell_{\text{Bern}}\{\hat{\theta}, \text{vech}(\hat{A})\} = \frac{1}{n^{1/2}} \nabla_{\theta} \ell(\hat{\theta}) - \frac{1}{n^{1/2}} \sum_{i=1}^n \exp(x_i^\top \hat{\kappa} + z_i^\top \hat{a}) \left| O\left(\frac{d^2}{n}\right) \right| B_i - \left( 0, \frac{1}{n^{1/2}} S_{\lambda} \hat{a} \right). \end{aligned}$$

We aim to prove that for all three response types, the first derivatives of the variational log-likelihood is dominated by  $\nabla_{\theta} \ell(\hat{\theta})$ . First, we have by Theorem 1 that  $\hat{\phi} \xrightarrow{p} \phi^0$ . Thus applying this result along with Conditions (C2)-(C3) and (C6') and Lemma 1, we have  $n^{-1/2} \hat{\phi}^{-2} \left| \sum_{i=1}^n z_i^\top \hat{A} z_i \right| \leq n^{-1/2} \hat{\phi}^{-2} \sum_{i=1}^n \|z_i\|^2 \|\hat{A}\| = O_p(d^2 n^{-1/2}) = o_p(d^{-1/2})$ . Also, by Conditions (C6') and  $\lambda_j = o(n^{1/2} d^{-1})$  for all  $j = 1, \dots, q$ , we have  $n^{-1/2} S_{\lambda} \hat{\beta} = o(d^{-1/2})$  element-wise. Turning to the Poisson and Bernoulli response case, by the estimation consistency result from Theorem 1 along with Conditions (C2)-(C3) and (C6'), we have  $n^{-1/2} \sum_{i=1}^n \exp(x_i^\top \hat{\kappa} + z_i^\top \hat{\beta}) \left| O(d^2 n^{-1}) \right| B_i = O_p(d^2 n^{-1/2}) = o_p(d^{-1/2})$  element-wise.

Applying the above results, we therefore obtain

$$0 = \frac{1}{n^{1/2}} \nabla_{\theta} \ell_{\text{resp}}\{\hat{\theta}, \text{vech}(\hat{A})\} = \frac{1}{n^{1/2}} \nabla_{\theta} \ell(\hat{\theta}) + \delta_1,$$

where  $\delta_1 = o_p(d^{-1/2})$  element-wise and  $\ell_{\text{resp}}\{\theta, \text{vech}(A)\}$  refers to one of  $\ell_{\text{Norm}}\{\theta, \text{vech}(A)\}$ ,  $\ell_{\text{Pois}}\{\theta, \text{vech}(A)\}$ , or  $\ell_{\text{Bern}}\{\theta, \text{vech}(A)\}$  depending on the response type. Next, applying a Taylor

series expansion to  $\nabla_{\theta}\ell(\hat{\theta})$  about  $\theta^0$ , we have

$$\begin{aligned} 0 &= \frac{1}{n^{1/2}} \nabla_{\theta}\ell(\hat{\theta}) + \delta_1 \\ &= \frac{1}{n^{1/2}} \nabla_{\theta}\ell(\theta^0) - \left\{ -\frac{1}{n} \nabla_{\theta}^2 \ell(\theta^0) \right\} n^{1/2}(\hat{\theta} - \theta^0) + \frac{1}{2n^{1/2}} \nu + \delta_1 \end{aligned}$$

where  $\nu$  is a vector with  $t$ -th element  $\nu_t = \sum_{r,s=1}^{\dim(\theta)} \partial^3 \ell(\bar{\theta}) / \partial \theta_t \partial \theta_r \partial \theta_s (\hat{\theta} - \theta^0)_r (\hat{\theta} - \theta^0)_s$  with  $(\hat{\theta} - \theta^0)_r$  denoting the  $r$ -th element of  $(\hat{\theta} - \theta^0)$ , and  $\bar{\theta}$  lies on the line segment joining  $\hat{\theta}$  and  $\theta^0$ . Note that by the Cauchy-Schwarz inequality,

$$\begin{aligned} \frac{1}{n^{1/2}} |\nu_t| &\leq \frac{1}{n^{1/2}} \|(\hat{\theta} - \theta^0)\|^2 \sum_{i=1}^n \left( \sum_{r,s=1}^{\dim(\theta)} G_{rst}^2(y_i) \right)^{1/2} \quad \text{by Condition (C5)} \\ &= O_p \left( \frac{d^2}{n^{1/2}} \right) \quad \text{by independence of the observations and Theorem 1} \\ &= o_p \left( \frac{1}{d^{1/2}} \right) \quad \text{by Condition (C6')}. \end{aligned}$$

In addition, with a similar proof to that of Proposition 2, we can show that under Condition (C6'),  $\| -n^{-1} \nabla_{\theta}^2 \ell(\theta^0) - \mathcal{J}(\theta^0) \| = O_p(d^{-3/2})$ . Applying these two results, we obtain

$$0 = \frac{1}{n^{1/2}} \nabla_{\theta}\ell(\theta^0) - \left\{ \mathcal{J}(\theta^0) + O_p \left( \frac{1}{d^{3/2}} \right) \right\} n^{1/2}(\hat{\theta} - \theta^0) + \frac{1}{2n^{1/2}} \nu + \delta_1. \quad (4)$$

Furthermore, rearranging equation (4) we obtain  $n^{1/2} \mathcal{J}(\theta^0)(\hat{\theta} - \theta^0) = n^{-1/2} \nabla_{\theta}\ell(\theta^0) + \delta$ , where  $\delta = o_p(d^{-1/2})$  element-wise.

Let  $G$  be a  $k \times \dim(\theta)$  matrix with  $k < d$  a fixed constant and satisfying  $GG^{\top} = I_k$ . Then following straightforward manipulation, we obtain

$$n^{1/2} G(\hat{\theta} - \theta^0) = \frac{1}{n^{1/2}} G \mathcal{J}^{-1}(\theta^0) \nabla_{\theta}\ell(\theta^0) + G \mathcal{J}^{-1}(\theta^0) \delta. \quad (5)$$

We now show that the last term on the right hand side of (5) is asymptotically negligible. To do this, let  $\tau_{\max}(\cdot)$  and  $\tau_{\min}(\cdot)$  denote the maximum and minimum eigenvalues of a matrix. As  $\mathcal{J}^{-1}(\theta^0)$

195 and  $\mathbf{G}^\top \mathbf{G}$  are both positive-semidefinite matrix, it follows that

$$\begin{aligned}
\tau_{\max}\{\mathcal{J}^{-1}(\boldsymbol{\theta}^0)\mathbf{G}^\top \mathbf{G}\mathcal{J}^{-1}(\boldsymbol{\theta}^0)\} &\leq \tau_{\max}\{\mathcal{J}^{-1}(\boldsymbol{\theta}^0)\}^2 \tau_{\max}(\mathbf{G}^\top \mathbf{G}) \\
&= \tau_{\max}\{\mathcal{J}^{-1}(\boldsymbol{\theta}^0)\}^2 \tau_{\max}(\mathbf{G}\mathbf{G}^\top) \\
&= \frac{1}{\tau_{\min}\{\mathcal{J}(\boldsymbol{\theta}^0)\}^2} \\
&= O(1) \quad \text{by Condition (C4)}.
\end{aligned}$$

196 Therefore,  $\|\mathbf{G}\mathcal{J}^{-1}(\boldsymbol{\theta}^0)\boldsymbol{\delta}\|^2 \leq \tau_{\max}\{\mathcal{J}^{-1}(\boldsymbol{\theta}^0)\mathbf{G}^\top \mathbf{G}\mathcal{J}^{-1}(\boldsymbol{\theta}^0)\}\|\boldsymbol{\delta}\|^2 = o_p(1)$  since  $\boldsymbol{\delta} = o_p(d^{-1/2})$   
197 element-wise. Equation (5) hence reduces to

$$n^{1/2}\mathbf{G}(\hat{\boldsymbol{\theta}} - \boldsymbol{\theta}^0) = \frac{1}{n^{1/2}}\mathbf{G}\mathcal{J}^{-1}(\boldsymbol{\theta}^0)\nabla_{\boldsymbol{\theta}}\ell(\boldsymbol{\theta}^0) + o_p(1).$$

198 To establish the asymptotic normality of the VA estimates, we let  $\mathbf{L}_i = n^{-1/2}\mathbf{G}\mathcal{J}^{-1}(\boldsymbol{\theta}^0)\partial \ln f(y_i|\boldsymbol{\theta}^0)/\partial \boldsymbol{\theta}$   
199 such that  $\sum_{i=1}^n \mathbf{L}_i = n^{-1/2}\mathbf{G}\mathcal{J}^{-1}(\boldsymbol{\theta}^0)\nabla_{\boldsymbol{\theta}}\ell(\boldsymbol{\theta}^0)$ . Note that  $\mathbb{E}(\mathbf{L}_i) = \mathbf{0}$  and  $\text{Var}(\mathbf{L}_i) = n^{-1}\mathbf{G}\mathcal{J}^{-1}(\boldsymbol{\theta}^0)\mathbf{G}^\top$   
200 by Conditions (C3) and (C4) respectively. We need to show the Lindeberg condition is satisfied.  
201 That is, for any  $\varepsilon > 0$

$$\begin{aligned}
&\lim_{n \rightarrow \infty} \frac{1}{n} \sum_{i=1}^n \mathbb{E} \left[ \left\{ \mathbf{L}_i - \mathbb{E}(\mathbf{L}_i) \right\}^\top \left( \frac{1}{n} \mathbf{G}\mathcal{J}^{-1}(\boldsymbol{\theta}^0)\mathbf{G}^\top \right)^{-1} \left\{ \mathbf{L}_i - \mathbb{E}(\mathbf{L}_i) \right\} \right. \\
&\quad \left. \times \mathbb{1}_{\left\{ \left\| \mathbf{L}_i - \mathbb{E}(\mathbf{L}_i) \right\|^\top \left( \frac{1}{n} \mathbf{G}\mathcal{J}^{-1}(\boldsymbol{\theta}^0)\mathbf{G}^\top \right)^{-1} \left\{ \mathbf{L}_i - \mathbb{E}(\mathbf{L}_i) \right\} > n\varepsilon \right\}} \right] = 0
\end{aligned}$$

202 To see the above is true, first note that from the prove of Theorem 1 it is straightforward to  
203 show  $\mathbf{L}_i = O_p(n^{-1/2})$  element-wise (see also Theorem 14.4.1, Bishop et al., 2007). Therefore  
204  $\mathbb{E}(\|\mathbf{L}_i - \mathbb{E}(\mathbf{L}_i)\|^2)^2 = \mathbb{E}(\|\mathbf{L}_i\|^2)^2 = O_p(n^{-2})$ . By Markov's inequality then,

$$\mathbb{E} \left( \mathbb{1}_{\|\mathbf{L}_i - \mathbb{E}(\mathbf{L}_i)\|^2 > \frac{\varepsilon}{d}} \right)^2 = \mathbb{P} \left( \|\mathbf{L}_i\|^2 \geq \frac{\varepsilon}{d} \right) \leq \frac{d}{\varepsilon} \mathbb{E}(\|\mathbf{L}_i\|^2) = O_p \left( \frac{d}{n} \right).$$

205 Next, note that  $\tau_{\max}\{(\mathbf{G}\mathcal{J}^{-1}(\boldsymbol{\theta}^0)\mathbf{G}^\top)^{-1}\} = \tau_{\min}\{\mathcal{J}^{-1}(\boldsymbol{\theta}^0)\mathbf{G}^\top \mathbf{G}\}^{-1} = \tau_{\min}\{\mathcal{J}^{-1}(\boldsymbol{\theta}^0)\}^{-1} = \tau_{\max}\{\mathcal{J}(\boldsymbol{\theta}^0)\}$ .

206 Furthermore, by the Gershgorin circle theorem  $\tau_{\max}(\mathcal{J}(\boldsymbol{\theta}^0))$  is at most of order  $O_p(d)$ . It follows  
 207 that

$$\begin{aligned}
 T &= \lim_{n \rightarrow \infty} \frac{1}{n} \sum_{i=1}^n \mathbb{E} \left[ \{ \mathbf{L}_i - \mathbb{E}(\mathbf{L}_i) \}^\top \left( \frac{1}{n} \mathbf{G} \mathcal{J}^{-1}(\boldsymbol{\theta}^0) \mathbf{G}^\top \right)^{-1} \{ \mathbf{L}_i - \mathbb{E}(\mathbf{L}_i) \} \right. \\
 &\quad \left. \times \mathbb{1}_{\{ \mathbf{L}_i - \mathbb{E}(\mathbf{L}_i) \}^\top \left( \frac{1}{n} \mathbf{G} \mathcal{J}^{-1}(\boldsymbol{\theta}^0) \mathbf{G}^\top \right)^{-1} \{ \mathbf{L}_i - \mathbb{E}(\mathbf{L}_i) \} > n\varepsilon} \right] \\
 &= \lim_{n \rightarrow \infty} \sum_{i=1}^n \mathbb{E} \left( \mathbf{L}_i^\top \left( \mathbf{G} \mathcal{J}^{-1}(\boldsymbol{\theta}^0) \mathbf{G}^\top \right)^{-1} \mathbf{L}_i \times \mathbb{1}_{\mathbf{L}_i^\top (\mathbf{G} \mathcal{J}^{-1}(\boldsymbol{\theta}^0) \mathbf{G}^\top)^{-1} \mathbf{L}_i > \varepsilon} \right) \\
 &\leq \lim_{n \rightarrow \infty} \sum_{i=1}^n \mathbb{E} \left( \tau_{\max} \{ \mathcal{J}(\boldsymbol{\theta}^0) \} \|\mathbf{L}_i\|^2 \times \mathbb{1}_{\|\mathbf{L}_i\|^2 > \varepsilon \tau_{\max} \{ \mathcal{J}(\boldsymbol{\theta}^0) \}^{-1}} \right) \\
 &\leq \tau_{\max} \{ \mathcal{J}(\boldsymbol{\theta}^0) \} \lim_{n \rightarrow \infty} \sum_{i=1}^n \left( \mathbb{E} (\|\mathbf{L}_i\|^2)^2 \times \mathbb{E} \left( \mathbb{1}_{\|\mathbf{L}_i\|^2 > \varepsilon \tau_{\max} \{ \mathcal{J}(\boldsymbol{\theta}^0) \}^{-1}} \right)^2 \right)^{1/2} \\
 &= \lim_{n \rightarrow \infty} O_p \left( \frac{d^{3/2}}{n^{1/2}} \right) = 0
 \end{aligned}$$

208 Thus the Lindeberg condition is satisfied and we can apply the multivariate Lindeberg-Feller central  
 209 limit theorem to obtain  $n^{-1/2} \mathbf{G} \mathcal{J}^{-1}(\boldsymbol{\theta}^0) \nabla_{\boldsymbol{\theta}} \ell(\boldsymbol{\theta}^0) \xrightarrow{d} \mathcal{N}(\mathbf{0}, \mathbf{G} \mathcal{J}^{-1}(\boldsymbol{\theta}^0) \mathbf{G}^\top)$ , and

$$n^{1/2} \mathbf{G}(\hat{\boldsymbol{\theta}} - \boldsymbol{\theta}^0) \xrightarrow{d} \mathcal{N}(\mathbf{0}, \mathbf{G} \mathcal{J}^{-1}(\boldsymbol{\theta}^0) \mathbf{G}^\top).$$

210 Taking  $\mathbf{G}$  as the matrix which identifies the elements of  $\boldsymbol{\kappa}$  in  $\boldsymbol{\theta}$ , recalling that  $\dim(\boldsymbol{\kappa}) = p$  is finite,  
 211 it follows that  $n^{1/2} (\hat{\boldsymbol{\kappa}} - \boldsymbol{\kappa}^0) \xrightarrow{d} \mathcal{N}(\mathbf{0}, \mathcal{J}^{-1}(\boldsymbol{\theta}^0) \boldsymbol{\kappa})$  as required.



## B Illustration of How to Construct P-spline Basis Functions

We provide a simple illustration of how to construct P-spline (penalized B-spline) basis functions and perform the centering constraint. A general overview of spline basis construction as part of GAMs can be found in Sections 4.1 and 4.2 of Wood (2006), while more technical details on P-splines may be found in Eilers and Marx (1996), Poliakoff et al. (1999) and De Boor (2001).

Consider covariate  $j = 1, \dots, q$ , for which we want to construct a B-spline basis of degree  $m_j = 3$  and  $K_j = 5$  interior knots. In what follows, we shall suppress the dependence on  $j$  for ease of notation. With  $K$  interior knots, we define a total of  $K + 2m + 2$  knot locations  $u_0 < u_1 < u_2 < \dots < u_{K+2m+1}$ , with the first and last  $m$  knots placed at essentially arbitrary locations. Generally, the  $k^{\text{th}}$  B-spline basis function of degree  $m$ , written as  $Z_{k,m}(u)$ , can be defined recursively as follows. For  $k = 0, \dots, K + 2m + 1$ ,

$$Z_{k,m}(u) = \frac{u - u_k}{(u_{k+m} - u_k)} Z_{k,m-1}(u) + \frac{u_{k+m+1} - u}{u_{k+m+1} - u_{k+1}} Z_{k+1,m-1}(u),$$

and

$$Z_{k,0}(u) = \begin{cases} 1 & \text{if } u_k \leq u < u_{k+1}; \\ 0 & \text{if otherwise.} \end{cases}$$

The above recursion is referred to as the Cox-de Boor recursion formula (De Boor, 2001). Note that  $m = 0$  corresponds to a step function assigning one if  $u$  is in the  $k^{\text{th}}$  knot span  $[u_k, u_{k+1})$ . When  $m = 1$ ,  $Z_{k,1}(u)$  spans two intervals and is piecewise linear while  $Z_{k,2}(u)$  spans three intervals and is piecewise quadratic,  $Z_{k,3}(u)$  spans four intervals that is piecewise cubic, and so on. As discussed in the main text, the most common choice is cubic B-splines with  $m = 3$ , as it provides sufficient flexibility for approximating most functions. Note the local support of B-splines is one of main computational advantages, in contrast to standard polynomial splines, for instance.

231 At value  $u_i$  for observation  $i = 1, \dots, n$  the B-spline basis function smooth is then given by

$$s(u_i) = \sum_{k=0}^{K+m} Z_{k,m}(u_i) \beta_k = \mathbf{z}_i^\top \boldsymbol{\beta},$$

232 as given in Section 2 of the main text, where  $\boldsymbol{\beta} = (\beta_1^\top, \dots, \beta_d^\top)^\top$  is the vector of smoothing  
 233 coefficients of dimension  $d = K + m + 1$ .

234 Note that the first basis function  $k = 0$  is often referred to as the “intercept”, and in typical  
 235 B-spline implementations is removed to avoid multicollinearity issues. This in turn leaves  $\mathbf{z}_i$  being  
 236 of dimension  $d = K + m$ . In the below, we assume that this has been done.

237 P-splines are formed by combining the above B-spline basis functions with a difference penalty  
 238 on the smoothing coefficients to control for overfitting. Typically this is based on squared difference  
 239 of adjacent coefficients, such that the penalty can be written in the form  $P = \lambda \sum_{k=1}^{K+m} (\beta_{k+1} - \beta_k)^2$ .  
 240 This however can also be written in matrix form

$$\begin{aligned} P &= \lambda \boldsymbol{\beta}^\top \begin{pmatrix} 1 & -1 & 0 & \dots \\ -1 & 2 & -1 & \dots \\ 0 & -1 & 2 & \dots \\ \vdots & \vdots & \vdots & \dots \end{pmatrix} \boldsymbol{\beta} \\ &= \lambda \boldsymbol{\beta}^\top \mathbf{S} \boldsymbol{\beta}, \end{aligned}$$

241 where  $\lambda > 0$  is the smoothing parameter.

242 The construction of P-splines outlined above does not enforce any centering constraint, which  
 243 is reflected in the fact that both the  $n \times (K + m)$  B-spline model matrix  $\mathbf{Z}$  is only of rank  $(K +$   
 244  $m - 1)$ . To enforce this constraint, we want the mean of the elements  $\mathbf{Z}\boldsymbol{\beta}$  to be zero, which is  
 245 equivalent to wanting  $\mathbf{1}^\top \mathbf{Z}\boldsymbol{\beta} = 0$  where  $\mathbf{1}$  is a  $n$ -vector of ones. This constraint can be achieved  
 246 via reparameterization: specifically, if we can find a  $(K + m) \times (K + m - 1)$  orthogonal matrix  $\mathbf{H}$   
 247 such that  $\mathbf{1}^\top \mathbf{Z}\mathbf{H} = \mathbf{0}$ , then we can set  $\boldsymbol{\beta} = \mathbf{H}\tilde{\boldsymbol{\beta}}$  for a new vector of smoothing coefficients  $\tilde{\boldsymbol{\beta}}$  of

length  $(K + m - 1)$  such that  $\mathbf{Z}\boldsymbol{\beta} = \mathbf{Z}\mathbf{H}\tilde{\boldsymbol{\beta}} = \tilde{\mathbf{Z}}\tilde{\boldsymbol{\beta}}$  automatically satisfies the centering constraint.  
 Note that in turn, the smoothing penalty is redefined as  $\boldsymbol{\beta}^\top \mathbf{S}\boldsymbol{\beta} = \tilde{\boldsymbol{\beta}}^\top \mathbf{H}^\top \mathbf{S}\mathbf{H}\tilde{\boldsymbol{\beta}} = \tilde{\boldsymbol{\beta}}^\top \tilde{\mathbf{S}}\tilde{\boldsymbol{\beta}}$  and the  
 penalization is on the reparameterized smoothing coefficients  $\tilde{\boldsymbol{\beta}}$ . Such an orthogonal matrix can be  
 found by applying a QR decomposition to the vector of columns sums of  $\mathbf{Z}$  and then taking the last  
 $(K + m - 1)$  columns of the associated Q matrix.

In the script `pspline_set_up.R`, we present code which demonstrates how the above is imple-  
 mented in R. This code is used as part of our main fitting function `vagam` in the script `vagam_main.R`.

## C Additional Simulation Results

1) VA assuming an unstructured covariance for  $\mathbf{A}$  (VA-Unstruc); 2) VA assuming a block diagonal structure  $\mathbf{A}$  (VA-Bdiag); 3) A penalized likelihood approach using `mgcv`, with all settings set at the default options (`mgcv-Default`); 4) `mgcv` using P-splines and all other settings set at the default (`mgcv-P-splines`); 5) A mixed model approach using `gamm4` with P-splines and all other settings set at the default (`gamm4`). Note that methods 1, 2, and 5 employ a mixed model framework for GAMs, while methods 3 and 4 employ a penalized likelihood framework.

We used a variety of criteria to assess performance, as discussed in Section 6 in the main text.

### C.1 Poisson Responses

Table 1: Results for Poisson GAMs, based on averaging across simulated datasets. Below, we present results for the: bias and mean squared error of the parametric component ( $\text{Bias}_p$  and  $\text{MSE}_p$ ), coverage probability and mean width of the 95% confidence interval for the parametric component ( $\text{CI coverage}_p$  and  $\text{CI width}_p$ ), mean squared error for the overall fit on the linear predictor scale and mean response scale ( $\text{MSE}$  and  $\text{MSE}_{\text{resp}}$ ), mean width of the 95% confidence interval and interval score for the ten out of sample validation points ( $\text{CI width}$  and  $\text{Interval score}$ ).

| $n$  |                            | VA (Unstruc) | VA (Bdiag) | mgcv (Default) | mgcv (P-splines) | gamm4  |
|------|----------------------------|--------------|------------|----------------|------------------|--------|
| 100  | $\text{Bias}_p$            | -0.007       | -0.005     | -0.009         | -0.010           | -0.008 |
|      | $\text{MSE}_p$             | 0.012        | 0.014      | 0.010          | 0.016            | 0.012  |
|      | $\text{CI coverage}_p$     | 0.972        | 0.949      | 0.936          | 0.957            | 0.975  |
|      | $\text{CI width}_p$        | 0.545        | 0.505      | 0.348          | 0.473            | 0.474  |
|      | $\text{MSE}$               | 0.328        | 0.330      | 17.581         | 1346.472         | 0.627  |
|      | $\text{MSE}_{\text{resp}}$ | 22.820       | 22.786     | 21.021         | 23.329           | 22.803 |
|      | $\text{CI width}$          | 2.371        | 2.092      | 5.358          | 90.981           | 3.350  |
|      | $\text{Interval score}$    | 33.331       | 33.938     | 35.469         | 119.501          | 32.051 |
| 200  | $\text{Bias}_p$            | -0.004       | -0.004     | -0.003         | -0.005           | -0.004 |
|      | $\text{MSE}_p$             | 0.003        | 0.003      | 0.002          | 0.003            | 0.003  |
|      | $\text{CI coverage}_p$     | 0.967        | 0.959      | 0.941          | 0.948            | 0.961  |
|      | $\text{CI width}_p$        | 0.224        | 0.217      | 0.167          | 0.205            | 0.213  |
|      | $\text{MSE}$               | 0.205        | 0.203      | 10.197         | 36.133           | 0.395  |
|      | $\text{MSE}_{\text{resp}}$ | 19.619       | 19.297     | 16.647         | 20.103           | 19.615 |
|      | $\text{CI width}$          | 1.654        | 1.548      | 2.511          | 3.153            | 2.221  |
|      | $\text{Interval score}$    | 34.887       | 35.154     | 35.692         | 35.190           | 34.169 |
| 500  | $\text{Bias}_p$            | 0.000        | 0.000      | 0.000          | -0.001           | 0.000  |
|      | $\text{MSE}_p$             | 0.001        | 0.001      | 0.001          | 0.001            | 0.001  |
|      | $\text{CI coverage}_p$     | 0.946        | 0.943      | 0.930          | 0.938            | 0.941  |
|      | $\text{CI width}_p$        | 0.103        | 0.101      | 0.084          | 0.097            | 0.100  |
|      | $\text{MSE}$               | 0.125        | 0.124      | 2.720          | 1145.791         | 0.206  |
|      | $\text{MSE}_{\text{resp}}$ | 13.404       | 13.198     | 9.583          | 13.503           | 13.396 |
|      | $\text{CI width}$          | 1.179        | 1.143      | 1.281          | 5.359            | 1.448  |
|      | $\text{Interval score}$    | 36.594       | 36.696     | 37.366         | 40.420           | 36.258 |
| 1000 | $\text{Bias}_p$            | -0.000       | -0.000     | -0.000         | -0.000           | -0.000 |
|      | $\text{MSE}_p$             | 0.000        | 0.000      | 0.000          | 0.000            | 0.000  |
|      | $\text{CI coverage}_p$     | 0.968        | 0.963      | 0.951          | 0.965            | 0.965  |
|      | $\text{CI width}_p$        | 0.061        | 0.060      | 0.054          | 0.059            | 0.060  |
|      | $\text{MSE}$               | 0.076        | 0.076      | 0.430          | 0.201            | 0.111  |
|      | $\text{MSE}_{\text{resp}}$ | 9.250        | 9.110      | 6.472          | 9.445            | 9.244  |
|      | $\text{CI width}$          | 0.883        | 0.867      | 0.791          | 0.949            | 1.040  |
|      | $\text{Interval score}$    | 37.386       | 37.398     | 37.919         | 37.310           | 37.202 |

Table 2: Results for Poisson GAMs, based on taking the median across simulated datasets. Below, we present results for the: bias and mean squared error of the parametric component ( $\text{Bias}_p$  and  $\text{MSE}_p$ ), mean width of the 95% confidence interval for the parametric component ( $\text{CI width}_p$ ), mean squared error for the overall fit on the linear predictor scale and mean response scale ( $\text{MSE}$  and  $\text{MSE}_{\text{resp}}$ ), mean width of the 95% confidence interval and interval score for the ten out of sample validation points ( $\text{CI width}$  and  $\text{Interval score}$ ).

| $n$  |                            | VA (Unstruc) | VA (Bdiag) | mgcv (Default) | mgcv (P-splines) | gamm4  |
|------|----------------------------|--------------|------------|----------------|------------------|--------|
| 100  | $\text{Bias}_p$            | -0.000       | -0.005     | -0.005         | -0.009           | -0.002 |
|      | $\text{MSE}_p$             | 0.005        | 0.005      | 0.003          | 0.007            | 0.005  |
|      | $\text{CI width}_p$        | 0.483        | 0.444      | 0.333          | 0.452            | 0.465  |
|      | $\text{MSE}$               | 0.285        | 0.287      | 0.838          | 0.402            | 0.451  |
|      | $\text{MSE}_{\text{resp}}$ | 17.802       | 17.611     | 16.217         | 18.282           | 17.721 |
|      | $\text{CI width}$          | 2.327        | 2.035      | 2.841          | 2.928            | 3.134  |
|      | $\text{Interval score}$    | 34.176       | 34.084     | 34.395         | 33.845           | 32.096 |
| 200  | $\text{Bias}_p$            | -0.003       | -0.003     | -0.004         | -0.006           | -0.003 |
|      | $\text{MSE}_p$             | 0.001        | 0.001      | 0.001          | 0.001            | 0.001  |
|      | $\text{CI width}_p$        | 0.214        | 0.209      | 0.165          | 0.202            | 0.209  |
|      | $\text{MSE}$               | 0.180        | 0.179      | 0.530          | 0.224            | 0.267  |
|      | $\text{MSE}_{\text{resp}}$ | 16.461       | 16.241     | 13.266         | 16.997           | 16.469 |
|      | $\text{CI width}$          | 1.627        | 1.514      | 1.743          | 1.868            | 2.087  |
|      | $\text{Interval score}$    | 34.163       | 36.854     | 36.563         | 34.109           | 34.158 |
| 500  | $\text{Bias}_p$            | -0.001       | -0.001     | 0.000          | -0.001           | -0.001 |
|      | $\text{MSE}_p$             | 0.000        | 0.000      | 0.000          | 0.000            | 0.000  |
|      | $\text{CI width}_p$        | 0.101        | 0.100      | 0.083          | 0.097            | 0.099  |
|      | $\text{MSE}$               | 0.101        | 0.101      | 0.357          | 0.118            | 0.130  |
|      | $\text{MSE}_{\text{resp}}$ | 12.192       | 11.973     | 8.546          | 12.264           | 12.172 |
|      | $\text{CI width}$          | 1.150        | 1.116      | 1.036          | 1.209            | 1.381  |
|      | $\text{Interval score}$    | 37.125       | 37.114     | 37.204         | 37.126           | 37.212 |
| 1000 | $\text{Bias}_p$            | -0.000       | -0.001     | -0.000         | -0.001           | -0.000 |
|      | $\text{MSE}_p$             | 0.000        | 0.000      | 0.000          | 0.000            | 0.000  |
|      | $\text{CI width}_p$        | 0.060        | 0.060      | 0.054          | 0.059            | 0.060  |
|      | $\text{MSE}$               | 0.061        | 0.061      | 0.335          | 0.066            | 0.076  |
|      | $\text{MSE}_{\text{resp}}$ | 8.523        | 8.384      | 5.664          | 8.665            | 8.494  |
|      | $\text{CI width}$          | 0.859        | 0.843      | 0.735          | 0.882            | 0.996  |
|      | $\text{Interval score}$    | 36.986       | 36.985     | 37.420         | 37.013           | 37.098 |

Figure 1: Comparative boxplots of computation time in seconds for various methods of estimating GAMs with Poisson responses. Note time on the y-axis is on the log scale. Outliers have also been removed to better visualize the differences in time between the methods.

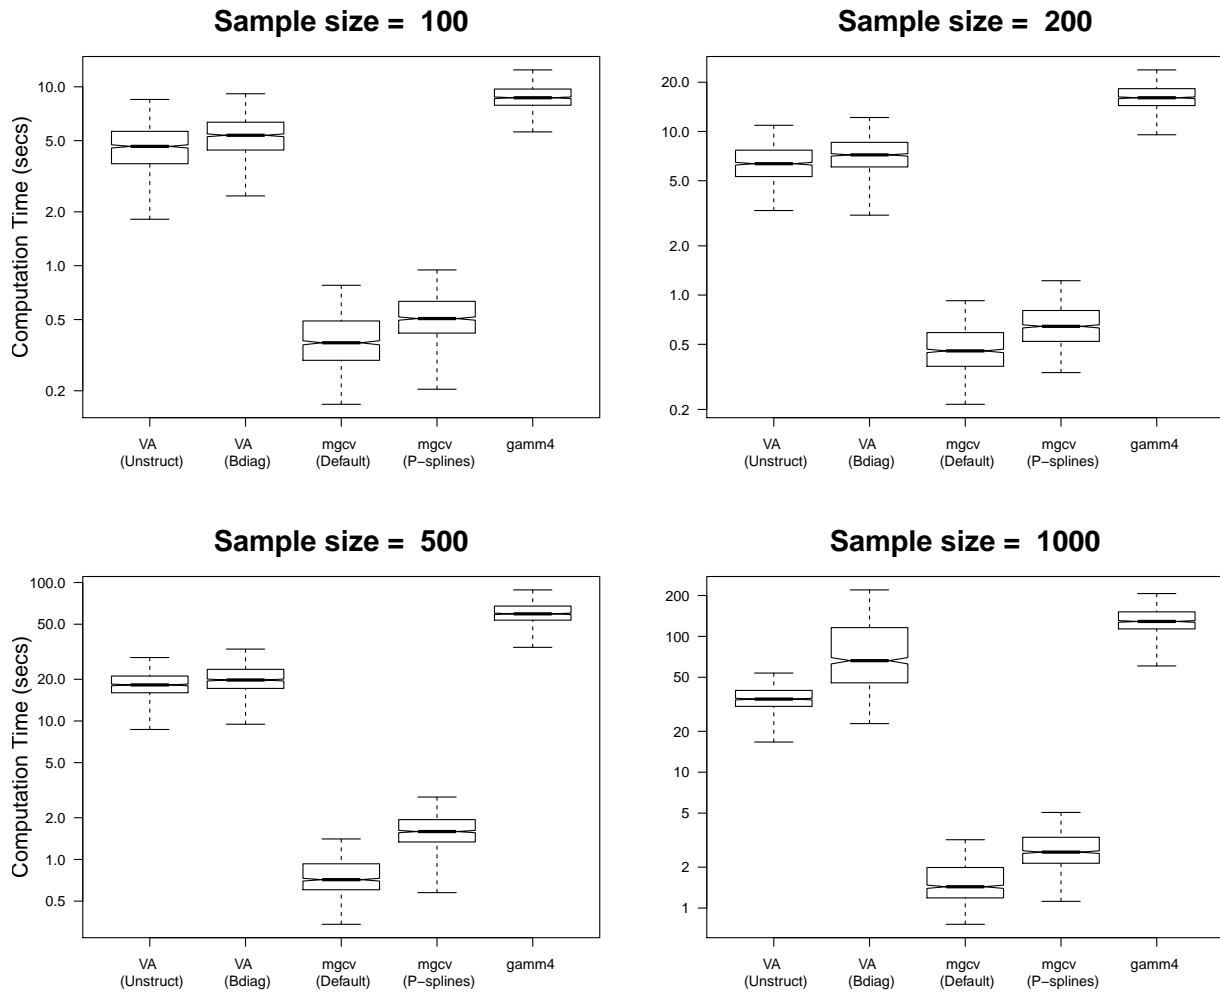





Table 3: Results for Bernoulli GAMs, based on averaging across simulated datasets. Below, we present results for the: bias and mean squared error of the parametric component ( $\text{Bias}_p$  and  $\text{MSE}_p$ ), coverage probability and mean width of the 95% confidence interval for the parametric component ( $\text{CI coverage}_p$  and  $\text{CI width}_p$ ), mean squared error for the overall fit on the linear predictor scale and mean response scale ( $\text{MSE}$  and  $\text{MSE}_{\text{resp}}$ ), mean width of the 95% confidence interval and interval score for the ten out of sample validation points ( $\text{CI width}$  and  $\text{Interval score}$ ).

| $n$  |                            | VA (Unstruc) | VA (Bdiag) | mgcv (Default) | mgcv (P-splines) | gamm4  |
|------|----------------------------|--------------|------------|----------------|------------------|--------|
| 100  | $\text{Bias}_p$            | -0.072       | -0.075     | 10.666         | 12.417           | 0.305  |
|      | $\text{MSE}_p$             | 0.319        | 0.313      | 2069.048       | 1468.879         | 5.934  |
|      | $\text{CI coverage}_p$     | 0.964        | 0.965      | 0.960          | 0.990            | 0.934  |
|      | $\text{CI width}_p$        | 2.340        | 2.327      | (> $10^4$ )    | (> $10^4$ )      | 3.989  |
|      | $\text{MSE}$               | 2.021        | 2.070      | (> $10^4$ )    | (> $10^4$ )      | 33.948 |
|      | $\text{MSE}_{\text{resp}}$ | 0.020        | 0.021      | 0.063          | 0.085            | 0.022  |
|      | $\text{CI width}_s$        | 2.690        | 2.590      | (> $10^4$ )    | (> $10^4$ )      | 10.473 |
|      | Interval score             | 31.466       | 31.690     | (> $10^4$ )    | (> $10^4$ )      | 30.305 |
| 200  | $\text{Bias}_p$            | -0.060       | -0.061     | 1.471          | 6.638            | 0.040  |
|      | $\text{MSE}_p$             | 0.174        | 0.173      | 712.480        | 908.577          | 0.269  |
|      | $\text{CI coverage}_p$     | 0.963        | 0.965      | 0.928          | 0.951            | 0.931  |
|      | $\text{CI width}_p$        | 1.692        | 1.687      | 255.685        | 4166.608         | 1.862  |
|      | $\text{MSE}$               | 1.191        | 1.209      | (> $10^4$ )    | (> $10^4$ )      | 1.417  |
|      | $\text{MSE}_{\text{resp}}$ | 0.012        | 0.012      | 0.018          | 0.037            | 0.012  |
|      | $\text{CI width}_s$        | 2.234        | 2.168      | 3894.705       | (> $10^4$ )      | 4.567  |
|      | Interval score             | 33.138       | 33.356     | 3918.445       | (> $10^4$ )      | 29.235 |
| 500  | $\text{Bias}_p$            | -0.032       | -0.033     | 0.019          | 0.009            | 0.023  |
|      | $\text{MSE}_p$             | 0.067        | 0.067      | 0.083          | 0.082            | 0.083  |
|      | $\text{CI coverage}_p$     | 0.962        | 0.961      | 0.956          | 0.958            | 0.952  |
|      | $\text{CI width}_p$        | 1.083        | 1.081      | 1.153          | 1.161            | 1.141  |
|      | $\text{MSE}$               | 0.635        | 0.663      | 17.013         | (> $10^4$ )      | 0.650  |
|      | $\text{MSE}_{\text{resp}}$ | 0.007        | 0.007      | 0.006          | 0.008            | 0.007  |
|      | $\text{CI width}_s$        | 1.718        | 1.669      | 3.251          | 8.954            | 3.166  |
|      | Interval score             | 35.086       | 35.189     | 33.735         | 37.202           | 32.158 |
| 1000 | $\text{Bias}_p$            | -0.028       | -0.029     | -0.001         | -0.012           | 0.006  |
|      | $\text{MSE}_p$             | 0.037        | 0.037      | 0.041          | 0.039            | 0.042  |
|      | $\text{CI coverage}_p$     | 0.952        | 0.954      | 0.961          | 0.957            | 0.952  |
|      | $\text{CI width}_p$        | 0.772        | 0.771      | 0.798          | 0.795            | 0.798  |
|      | $\text{MSE}$               | 0.356        | 0.379      | 0.619          | 0.566            | 0.350  |
|      | $\text{MSE}_{\text{resp}}$ | 0.004        | 0.004      | 0.003          | 0.004            | 0.004  |
|      | $\text{CI width}_s$        | 1.368        | 1.335      | 2.073          | 2.445            | 2.381  |
|      | Interval score             | 35.932       | 36.079     | 34.997         | 33.685           | 33.765 |

Table 4: Results for Bernoulli GAMs, based on taking the median across simulated datasets. Below, we present results for the: bias and mean squared error of the parametric component ( $\text{Bias}_p$  and  $\text{MSE}_p$ ), mean width of the 95% confidence interval for the parametric component ( $\text{CI width}_p$ ), mean squared error for the overall fit on the linear predictor scale and mean response scale ( $\text{MSE}$  and  $\text{MSE}_{\text{resp}}$ ), mean width of the 95% confidence interval and interval score for the ten out of sample validation points ( $\text{CI width}$  and  $\text{Interval score}$ ).

| $n$  |                            | VA (Unstruc) | VA (Bdiag) | mgcv (Default) | mgcv (P-splines) | gamm4  |
|------|----------------------------|--------------|------------|----------------|------------------|--------|
| 100  | $\text{Bias}_p$            | -0.071       | -0.071     | 0.669          | 3.576            | 0.117  |
|      | $\text{MSE}_p$             | 0.133        | 0.131      | 5.915          | 168.796          | 0.286  |
|      | $\text{CI width}_p$        | 2.317        | 2.307      | 36.566         | 634.870          | 2.718  |
|      | $\text{MSE}$               | 1.948        | 1.992      | 5267.241       | (> $10^4$ )      | 2.004  |
|      | $\text{MSE}_{\text{resp}}$ | 0.019        | 0.020      | 0.064          | 0.093            | 0.020  |
|      | $\text{CI width}_s$        | 2.627        | 2.519      | 2139.575       | (> $10^4$ )      | 5.908  |
|      | Interval score             | 31.051       | 31.148     | 2141.575       | (> $10^4$ )      | 27.103 |
| 200  | $\text{Bias}_p$            | -0.067       | -0.067     | 0.061          | 0.121            | 0.031  |
|      | $\text{MSE}_p$             | 0.069        | 0.068      | 0.120          | 0.255            | 0.099  |
|      | $\text{CI width}_p$        | 1.684        | 1.681      | 1.989          | 2.089            | 1.836  |
|      | $\text{MSE}$               | 1.127        | 1.152      | 3.040          | 3.185            | 1.109  |
|      | $\text{MSE}_{\text{resp}}$ | 0.011        | 0.011      | 0.015          | 0.019            | 0.012  |
|      | $\text{CI width}_s$        | 2.171        | 2.118      | 5.889          | 7.612            | 4.308  |
|      | Interval score             | 34.020       | 34.010     | 31.908         | 35.013           | 28.869 |
| 500  | $\text{Bias}_p$            | -0.029       | -0.032     | 0.023          | 0.016            | 0.034  |
|      | $\text{MSE}_p$             | 0.028        | 0.028      | 0.038          | 0.035            | 0.038  |
|      | $\text{CI width}_p$        | 1.080        | 1.078      | 1.146          | 1.146            | 1.135  |
|      | $\text{MSE}$               | 0.595        | 0.630      | 0.679          | 0.633            | 0.550  |
|      | $\text{MSE}_{\text{resp}}$ | 0.006        | 0.007      | 0.006          | 0.007            | 0.006  |
|      | $\text{CI width}_s$        | 1.685        | 1.624      | 2.870          | 3.284            | 3.079  |
|      | Interval score             | 34.182       | 36.247     | 34.448         | 31.690           | 31.564 |
| 1000 | $\text{Bias}_p$            | -0.027       | -0.027     | -0.002         | -0.006           | 0.011  |
|      | $\text{MSE}_p$             | 0.017        | 0.017      | 0.017          | 0.017            | 0.017  |
|      | $\text{CI width}_p$        | 0.772        | 0.770      | 0.796          | 0.794            | 0.797  |
|      | $\text{MSE}$               | 0.328        | 0.356      | 0.351          | 0.324            | 0.311  |
|      | $\text{MSE}_{\text{resp}}$ | 0.004        | 0.004      | 0.003          | 0.004            | 0.004  |
|      | $\text{CI width}_s$        | 1.337        | 1.306      | 2.001          | 2.340            | 2.342  |
|      | Interval score             | 37.256       | 37.240     | 34.364         | 34.291           | 34.320 |

Figure 2: Comparative boxplots of computation time in seconds for various methods of estimating GAMs with Bernoulli responses. Note time on the y-axis is on the log scale. Outliers have also been removed to better visualize the differences in time between the methods.

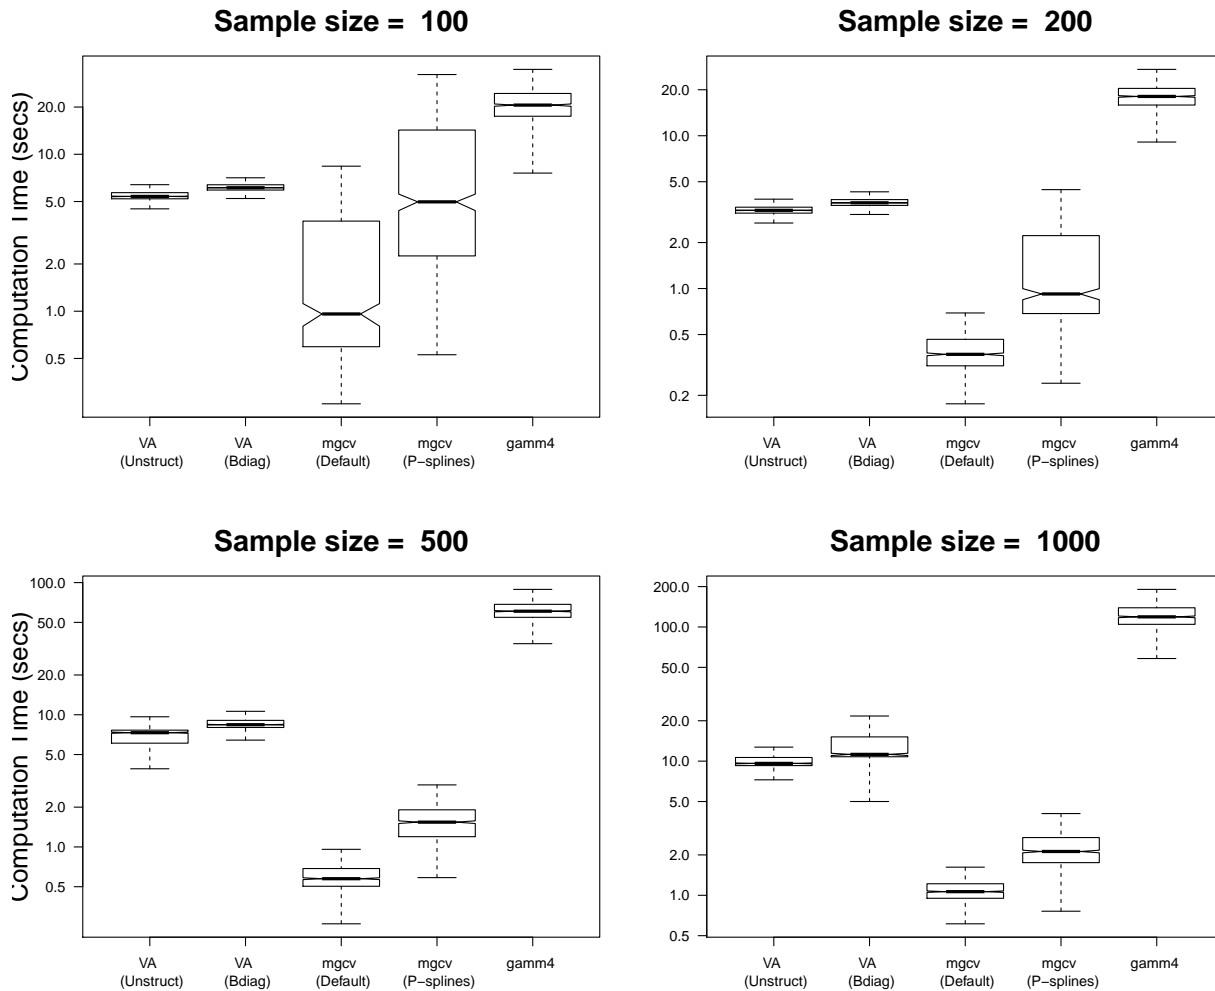

### 265 C.3 Normal responses

Table 5: Results for normal GAMs, based on averaging across simulated datasets. Below, we present results for the: bias and mean squared error of the parametric component ( $\text{Bias}_p$  and  $\text{MSE}_p$ ), coverage probability and mean width of the 95% confidence interval for the parametric component ( $\text{CI coverage}_p$  and  $\text{CI width}_p$ ), mean squared error for the overall fit on the linear predictor scale (MSE; note this is same as the MSE on the mean response scale), mean width of the 95% confidence interval and interval score for the ten out of sample validation points (CI width and Interval score).

| $n$  |                        | VA (Unstruc) | VA (Bdiag) | mgcv (Default) | mgcv (P-splines) | gamm4  |
|------|------------------------|--------------|------------|----------------|------------------|--------|
| 100  | $\text{Bias}_p$        | -0.013       | -0.011     | -0.010         | -0.015           | -0.012 |
|      | $\text{MSE}_p$         | 0.188        | 0.188      | 0.190          | 0.197            | 0.187  |
|      | $\text{CI coverage}_p$ | 0.932        | 0.941      | 0.937          | 0.933            | 0.937  |
|      | $\text{CI width}_p$    | 1.658        | 1.668      | 1.647          | 1.646            | 1.655  |
|      | MSE                    | 0.671        | 0.687      | 0.709          | 0.771            | 0.675  |
|      | CI width               | 3.355        | 3.094      | 3.316          | 3.598            | 3.534  |
|      | Interval score         | 30.963       | 31.666     | 31.488         | 30.466           | 30.546 |
| 200  | $\text{Bias}_p$        | 0.003        | 0.002      | 0.002          | 0.001            | 0.003  |
|      | $\text{MSE}_p$         | 0.084        | 0.084      | 0.085          | 0.084            | 0.084  |
|      | $\text{CI coverage}_p$ | 0.947        | 0.948      | 0.947          | 0.948            | 0.946  |
|      | $\text{CI width}_p$    | 1.148        | 1.154      | 1.140          | 1.143            | 1.147  |
|      | MSE                    | 0.389        | 0.397      | 0.389          | 0.416            | 0.390  |
|      | CI width               | 2.535        | 2.386      | 2.331          | 2.587            | 2.642  |
|      | Interval score         | 32.695       | 33.046     | 33.255         | 32.547           | 32.406 |
| 500  | $\text{Bias}_p$        | -0.002       | -0.002     | -0.003         | -0.002           | -0.002 |
|      | $\text{MSE}_p$         | 0.035        | 0.035      | 0.034          | 0.035            | 0.035  |
|      | $\text{CI coverage}_p$ | 0.950        | 0.951      | 0.949          | 0.951            | 0.950  |
|      | $\text{CI width}_p$    | 0.715        | 0.715      | 0.711          | 0.713            | 0.715  |
|      | MSE                    | 0.201        | 0.196      | 0.180          | 0.203            | 0.200  |
|      | CI width               | 1.875        | 1.802      | 1.506          | 1.825            | 1.925  |
|      | Interval score         | 34.743       | 34.898     | 35.790         | 34.817           | 34.593 |
| 1000 | $\text{Bias}_p$        | 0.004        | 0.004      | 0.004          | 0.004            | 0.004  |
|      | $\text{MSE}_p$         | 0.015        | 0.015      | 0.015          | 0.015            | 0.015  |
|      | $\text{CI coverage}_p$ | 0.956        | 0.958      | 0.961          | 0.956            | 0.955  |
|      | $\text{CI width}_p$    | 0.501        | 0.502      | 0.500          | 0.501            | 0.501  |
|      | MSE                    | 0.115        | 0.112      | 0.103          | 0.113            | 0.115  |
|      | CI width               | 1.412        | 1.368      | 1.089          | 1.355            | 1.443  |
|      | Interval score         | 36.080       | 36.228     | 36.937         | 36.151           | 35.995 |

Table 6: Results for normal GAMs, based on taking the median across simulated datasets. Below, we present results for the: bias and mean squared error of the parametric component ( $\text{Bias}_p$  and  $\text{MSE}_p$ ), mean width of the 95% confidence interval for the parametric component ( $\text{CI width}_p$ ), mean squared error for the overall fit on the linear predictor scale (MSE; note this is same as the MSE on the mean response scale), mean width of the 95% confidence interval and interval score for the ten out of sample validation points (CI width and Interval score).

| $n$ |                     | VA (Unstruc) | VA (Bdiag) | mgcv (Default) | mgcv (P-splines) | gam4   |
|-----|---------------------|--------------|------------|----------------|------------------|--------|
| 100 | $\text{Bias}_p$     | -0.018       | -0.020     | -0.003         | -0.028           | -0.022 |
|     | $\text{MSE}_p$      | 0.082        | 0.085      | 0.085          | 0.081            | 0.084  |
|     | $\text{CI width}_p$ | 1.650        | 1.662      | 1.645          | 1.641            | 1.652  |
|     | MSE                 | 0.649        | 0.663      | 0.661          | 0.709            | 0.652  |
|     | CI width            | 3.337        | 3.065      | 3.272          | 3.509            | 3.522  |
|     | Interval score      | 31.323       | 31.239     | 31.355         | 31.297           | 31.346 |
| 100 | $\text{Bias}_p$     | 0.005        | 0.008      | -0.004         | 0.001            | 0.007  |
|     | $\text{MSE}_p$      | 0.039        | 0.038      | 0.037          | 0.039            | 0.038  |
|     | $\text{CI width}_p$ | 1.144        | 1.149      | 1.140          | 1.142            | 1.144  |
|     | MSE                 | 0.374        | 0.377      | 0.370          | 0.391            | 0.374  |
|     | CI width            | 2.523        | 2.379      | 2.310          | 2.565            | 2.631  |
|     | Interval score      | 34.255       | 34.226     | 34.190         | 34.149           | 31.179 |
| 100 | $\text{Bias}_p$     | -0.010       | -0.011     | -0.008         | -0.009           | -0.009 |
|     | $\text{MSE}_p$      | 0.017        | 0.016      | 0.017          | 0.017            | 0.017  |
|     | $\text{CI width}_p$ | 0.715        | 0.716      | 0.711          | 0.714            | 0.715  |
|     | MSE                 | 0.196        | 0.190      | 0.173          | 0.195            | 0.195  |
|     | CI width            | 1.870        | 1.796      | 1.498          | 1.808            | 1.919  |
|     | Interval score      | 33.947       | 33.890     | 37.387         | 33.941           | 33.979 |
| 100 | $\text{Bias}_p$     | 0.003        | 0.003      | 0.003          | 0.004            | 0.003  |
|     | $\text{MSE}_p$      | 0.007        | 0.007      | 0.007          | 0.007            | 0.007  |
|     | $\text{CI width}_p$ | 0.501        | 0.501      | 0.500          | 0.501            | 0.501  |
|     | MSE                 | 0.114        | 0.109      | 0.100          | 0.110            | 0.113  |
|     | CI width            | 1.407        | 1.362      | 1.077          | 1.344            | 1.436  |
|     | Interval score      | 37.362       | 37.325     | 37.092         | 37.289           | 37.386 |

Figure 3: Comparative boxplots of computation time in seconds for various methods of estimating GAMs with normal responses. Note time on the y-axis is on the log scale. Outliers have also been removed to better visualize the differences in time between the methods.

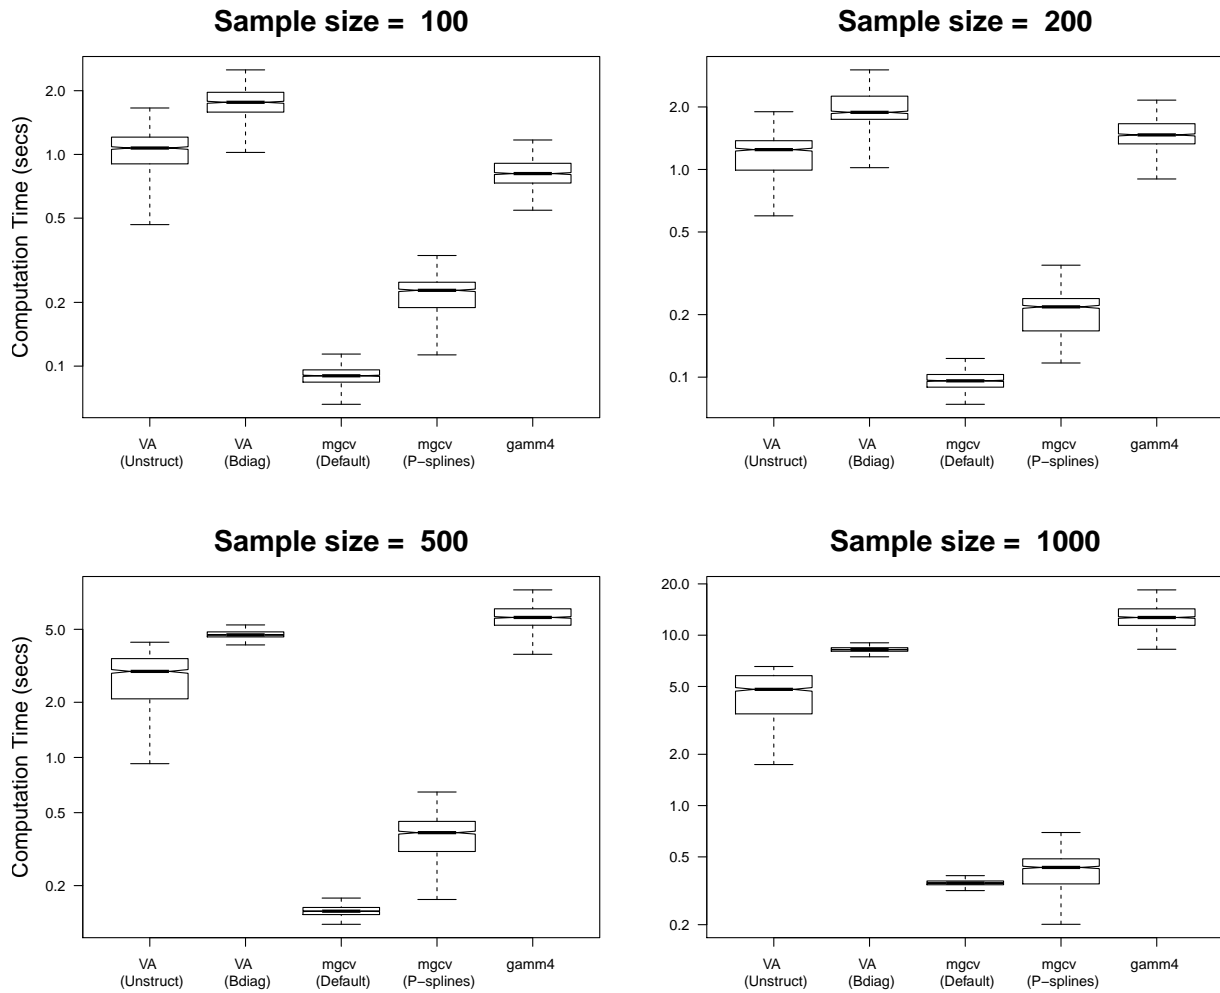

## D Additional Results for Application

Figure 4: Smooths from the fitted GAM using `mgcv` with default settings (top) and `gamm4` with default settings (bottom), regressing union membership as a function of six covariates. In both fitted GAMs, results show that no evidence of a relationship between probability of a worker being in a union and their age, borderline evidence of a relationship to education, and a strong non-linear relationship with their hourly wage.

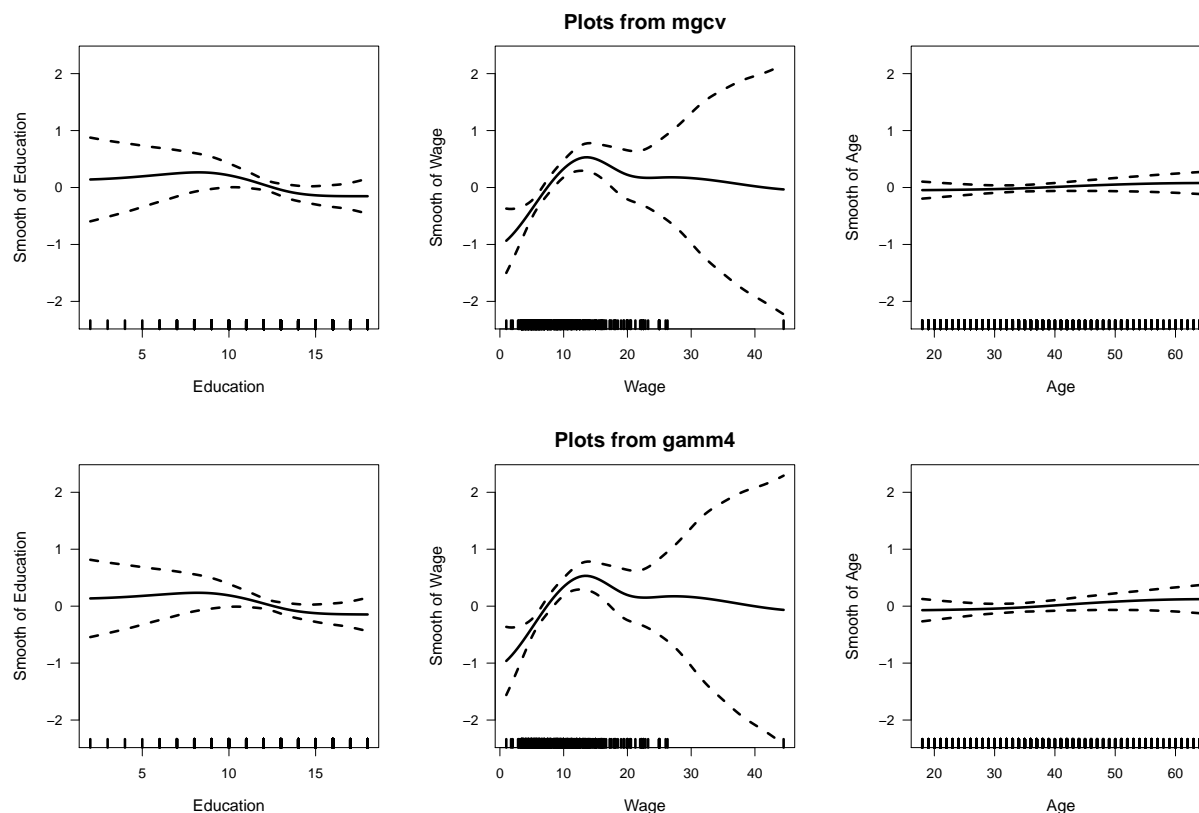

## References

Bishop, Y. M., Fienberg, S. E., and Holland, P. W. (2007). *Discrete Multivariate Analysis: Theory and Practice*. Springer, New York.

- 270 De Boor, C. (2001). Calculation of the smoothing spline with weighted roughness measure.  
271 *Mathematical Models and Methods in Applied Sciences*, 11:33–41.
- 272 Eilers, P. H. C. and Marx, B. D. (1996). Flexible smoothing with *B*-splines and penalties. *Statistical*  
273 *Science*, 11:89–121.
- 274 Poliakoff, J. F., Wong, Y. K., and Thomas, P. D. (1999). An automated curve fairing algorithm for  
275 cubic *B*-spline ccurve. *Journal of Computational and Applied Mathematics*, 102(1):73–85.
- 276 Wood, S. (2006). *Generalized Additive Models: An Introduction with R*. CRC press, Boca Raton,  
277 FL.
- 278 Zou, H. (2006). The adaptive Lasso and its oracle properties. *Journal of the American Statistical*  
279 *Association*, 101(476):1418–1429.
